# Supplementary material for: Palladium-catalyzed carbonylative synthesis of indole-3-carboxamides from 2-ethynylanilines and nitroarenes
Source: Royal Society of Chemistry journal article supplement (doi:10.1039/d2qo01065h), 2022-01-01

## Supporting Information

### Palladium-Catalyzed Carbonylative Synthesis of Indole-3-Carboxamides from 2-Ethynylanilines and Nitroarenes

Jiangjie Zhang,<sup>†,a</sup> Shangyuan Wang,<sup>†,a</sup> Jian-Shu Wang,<sup>a</sup> Jun Ying,<sup>\*a</sup> and Xiao-Feng Wu<sup>\*b</sup>

<sup>a</sup> Department of Chemistry, Key Laboratory of Surface & Interface Science of Polymer Materials of Zhejiang Province, Zhejiang Sci-Tech University, Hangzhou 310018, China.

<sup>b</sup> Dalian National Laboratory for Clean Energy, Dalian Institute of Chemical Physics, Chinese Academy of Sciences, 116023 Dalian, Liaoning, China. Leibniz-Institut für Katalyse e. V., Albert-Einstein-Straße 29a, 18059 Rostock, Germany.

<sup>†</sup> These authors contribute equally to this work.

\*E-mail: yingjun@zstu.edu.cn

\*E-mail: xwu2020@dicp.ac.cn; xiao-feng.wu@catalysis.de

## Table of Contents

|                                                                                           |     |
|-------------------------------------------------------------------------------------------|-----|
| 1. General experimental information .....                                                 | S1  |
| 2. General procedure for the synthesis of <i>N</i> -Ts-2-ethynylanilines (1a-n) .....     | S2  |
| 3. General procedure for the synthesis of indole-3-carboxamides (3aa-am, 3ba-na).....     | S3  |
| 4. Characterization data of products 3aa-am and 3ba-na .....                              | S4  |
| 5. References .....                                                                       | S19 |
| 6. <sup>1</sup> H, <sup>13</sup> C spectra of compounds 3aa-am, 3ba-na, 6, 8, and 11..... | S20 |

## 1. General experimental information

Unless otherwise noted, all reactions were carried out under nitrogen atmosphere. All commercially available reagents were used without further purification. All of the solvents were treated according to known methods. Column chromatography was performed on silica gel (200-400 mesh).  $^1\text{H}$  NMR (400 MHz) chemical shifts were reported in ppm ( $\delta$ ) relative to tetramethylsilane (TMS) with the solvent resonance employed as the internal standard.  $^{13}\text{C}$  NMR (100 MHz) chemical shifts were reported in ppm ( $\delta$ ) from tetramethylsilane (TMS) with the solvent resonance as the internal standard. Data were reported as follows: chemical shift, multiplicity (s = singlet, d = doublet, t = triplet, q = quartet, dd = doublet of doublets, td = triplet of doublets, qd = quartet of doublets, m = multiplet), coupling constants (Hz) and integration. HRMS measurements were obtained on a TOF analyzer.

## 2. General procedure for the synthesis of *N*-Ts-2-ethynylanilines (1a-n)

The *N*-Ts-2-ethynylanilines were prepared according to a general procedure reported by Knochel<sup>[1]</sup>.

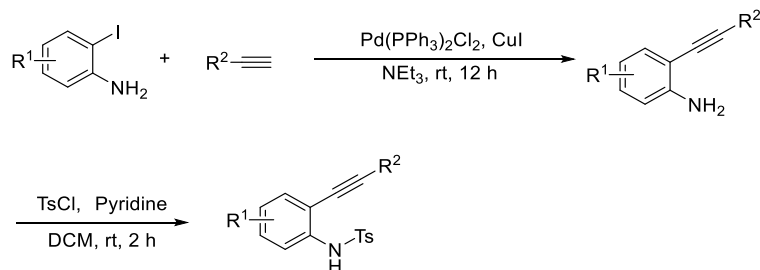

To a solution of corresponding 2-iodoanilines (2.19 g, 10 mmol, 1.0 equiv), Pd(PPh<sub>3</sub>)<sub>2</sub>Cl<sub>2</sub> (140 mg, 2 mol %), and CuI (38 mg, 2 mol %) in NEt<sub>3</sub> (40 mL) was added terminal alkynes (1.12 g, 11 mmol, 1.1 equiv). The resulting mixture was stirred at room temperature for 12 h. The mixture was filtered by short silica, then the solvent was evaporated under reduced pressure and the residue was purified by flash chromatography on silica gel (petroleum ether / ethyl acetate = 10:1) to afford 2-ethynylanilines.

To a solution of 2-ethynylanilines (0.772 g, 4 mmol, 1.0 equiv), TsCl (1 g, 5.2 mmol, 1.3 equiv), and pyridine (500  $\mu$ L) in DCM (8 mL). The resulting mixture was stirred at room temperature for 2 h. The reaction mixture was quenched with ice-cold water and extracted with DCM. The combined organic layer was washed with 2N HCl solution, dried and evaporated to give crude residue. The residue was purified by flash chromatography on silica gel (petroleum ether / ethyl acetate = 10:1) to afford *N*-Ts-2-ethynylanilines.

### 3. General procedure for the synthesis of indole-3-carboxamides (3aa-am, 3ba-na)

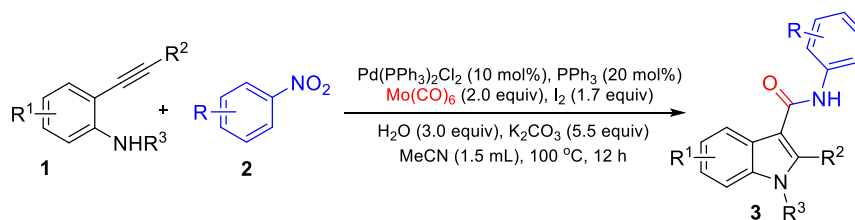

*N*-Ts-2-ethynylanilines **1** (0.2 mmol, 1.0 equiv), I<sub>2</sub> (86.3 mg, 0.34 mmol, 1.7 equiv) and K<sub>2</sub>CO<sub>3</sub> (82.9 mg, 0.6 mmol, 3.0 equiv) were added to an oven-dried tube (15.0 mL) which was then placed under vacuum and refilled with nitrogen three times. CH<sub>3</sub>CN (1.0 mL) was added into the tube via syringe and the tube was sealed and stirred at 50 °C for 2.5 h. Then nitroarenes **2** (0.30 mmol, 1.5 equiv), Mo(CO)<sub>6</sub> (105.6 mg, 0.4 mmol, 2.0 equiv), Pd(PPh<sub>3</sub>)<sub>2</sub>Cl<sub>2</sub> (14.0 mg, 10 mol %), PPh<sub>3</sub> (15.6 mg, 20 mol %), H<sub>2</sub>O (10.8 mg, 0.6 mmol, 3.0 equiv) and CH<sub>3</sub>CN (0.5 mL) were added into the tube via syringe. The tube was sealed and stirred at 100 °C for 12 h. Upon the reaction was completed, the resulting mixture was purified by silica gel column using chromatography (petroleum ether / ethyl acetate = 5:1) to obtain products **3**.

#### 4. Characterization data of products 3aa-am and 3ba-na

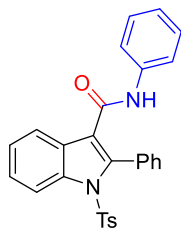

***N*,2-diphenyl-1-tosyl-1*H*-indole-3-carboxamide (3aa)**<sup>[2]</sup>. The product was purified by column chromatography (petroleum ether / ethyl acetate = 5:1); White solid, 68.1 mg, 73% yield, mp 158 – 159 °C; <sup>1</sup>H NMR (400 MHz, CDCl<sub>3</sub>) δ 8.39 (d, *J* = 8.4 Hz, 1H), 8.32 (d, *J* = 7.8 Hz, 1H), 7.64 (t, *J* = 7.4 Hz, 1H), 7.55 (t, *J* = 7.5 Hz, 2H), 7.50 – 7.44 (m, 3H), 7.41 (t, *J* = 7.7 Hz, 1H), 7.37 (d, *J* = 8.2 Hz, 2H), 7.19 (t, *J* = 7.8 Hz, 2H), 7.13 (d, *J* = 8.1 Hz, 2H), 7.08 – 6.98 (m, 3H), 6.76 (s, 1H), 2.34 (s, 3H); <sup>13</sup>C NMR (100 MHz, CDCl<sub>3</sub>) δ 161.7, 145.6, 139.3, 137.6, 136.5, 135.5, 131.7, 130.6, 130.0, 129.8, 128.9, 128.7, 128.4, 127.0, 126.0, 124.9, 124.2, 122.3, 119.5, 118.2, 115.2, 21.7.

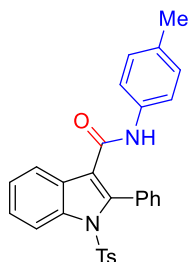

**2-phenyl-*N*-(*p*-tolyl)-1-tosyl-1*H*-indole-3-carboxamide (3ab)**. The product was purified by column chromatography (petroleum ether / ethyl acetate = 5:1); White solid, 73.9 mg, 77% yield, mp 255 – 256 °C; <sup>1</sup>H NMR (400 MHz, CDCl<sub>3</sub>) δ 8.37 (d, *J* = 8.4 Hz, 1H), 8.30 (d, *J* = 7.8 Hz, 1H), 7.64 – 7.59 (m, 1H), 7.54 (t, *J* = 7.5 Hz, 2H), 7.49 – 7.43 (m, 3H), 7.42 – 7.38 (m, 1H), 7.36 (d, *J* = 8.0 Hz, 2H), 7.12 (d, *J* = 8.0 Hz, 2H), 6.99 (d, *J* = 8.1 Hz, 2H), 6.91 (d, *J* = 8.1 Hz, 2H), 6.66 (s, 1H), 2.34 (s, 3H), 2.25 (s, 3H); <sup>13</sup>C NMR (100 MHz, CDCl<sub>3</sub>) δ 161.5, 145.5, 139.1, 136.5, 135.5, 135.0, 133.8, 131.6, 130.5, 130.1, 129.7, 129.4, 128.6, 128.4, 127.0, 126.0, 124.9, 122.3, 119.5, 118.3, 115.2, 21.6, 20.8; HRMS (ESI-TOF) Calcd. For C<sub>29</sub>H<sub>25</sub>N<sub>2</sub>O<sub>3</sub>S<sup>+</sup> [M+H]<sup>+</sup>: 481.1580; found: 481.1586.

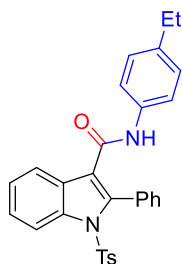

***N*-(4-ethylphenyl)-2-phenyl-1-tosyl-1*H*-indole-3-carboxamide (3ac).** The product was purified by column chromatography (petroleum ether / ethyl acetate = 5:1); White solid, 64.2 mg, 65% yield, mp 199 – 201 °C; <sup>1</sup>H NMR (400 MHz, CDCl<sub>3</sub>) δ 8.38 (d, *J* = 8.4 Hz, 1H), 8.31 (d, *J* = 7.8 Hz, 1H), 7.63 (t, *J* = 7.5 Hz, 1H), 7.54 (t, *J* = 7.5 Hz, 2H), 7.48 – 7.45 (m, 3H), 7.41 (d, *J* = 6.7 Hz, 1H), 7.37 (d, *J* = 8.3 Hz, 2H), 7.12 (d, *J* = 8.2 Hz, 2H), 7.03 (d, *J* = 8.3 Hz, 2H), 6.95 (d, *J* = 8.2 Hz, 2H), 6.70 (s, 1H), 2.55 (q, *J* = 7.6 Hz, 2H), 2.34 (s, 3H), 1.17 (t, *J* = 7.6 Hz, 3H); <sup>13</sup>C NMR (100 MHz, CDCl<sub>3</sub>) δ 161.6, 145.5, 140.3, 139.1, 136.5, 135.5, 135.2, 131.7, 130.5, 130.1, 129.7, 128.6, 128.4, 128.2, 127.0, 126.0, 124.9, 122.3, 119.6, 118.3, 115.2, 28.3, 21.7, 15.7; HRMS (ESI-TOF) Calcd. for C<sub>30</sub>H<sub>27</sub>N<sub>2</sub>O<sub>3</sub>S<sup>+</sup> [M+H]<sup>+</sup>: 495.1737; found: 495.1742.

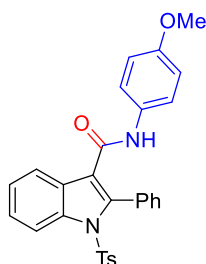

***N*-(4-methoxyphenyl)-2-phenyl-1-tosyl-1*H*-indole-3-carboxamide (3ad)<sup>[2]</sup>.** The product was purified by column chromatography (petroleum ether / ethyl acetate = 5:1); White solid, 67.5 mg, 68% yield, mp 209 – 212 °C; <sup>1</sup>H NMR (400 MHz, CDCl<sub>3</sub>) δ 8.37 (d, *J* = 8.4 Hz, 1H), 8.28 (d, *J* = 8.7 Hz, 1H), 7.62 (t, *J* = 7.4 Hz, 1H), 7.54 (t, *J* = 7.4 Hz, 2H), 7.49 – 7.43 (m, 3H), 7.34 – 7.41 (m, 3H), 7.12 (d, *J* = 8.3 Hz, 2H), 6.95 (d, *J* = 9.0 Hz, 2H), 6.73 (d, *J* = 9.0 Hz, 2H), 6.63 (s, 1H), 3.73 (s, 3H), 2.34 (s, 3H); <sup>13</sup>C NMR (100 MHz, CDCl<sub>3</sub>) δ 161.5, 156.4, 145.5, 139.1, 136.5, 135.5, 131.7, 130.7, 130.4, 130.1, 129.7, 128.6, 128.4, 127.0, 126.0, 124.9, 122.2, 121.2, 118.4, 115.2, 114.1, 55.5, 21.6.

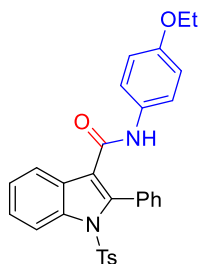

***N*-(4-ethoxyphenyl)-2-phenyl-1-tosyl-1*H*-indole-3-carboxamide (3ae).** The product was purified by column chromatography (petroleum ether / ethyl acetate = 5:1); White solid, 67.3 mg, 66% yield, mp 155 – 156 °C;  $^1\text{H}$  NMR (400 MHz,  $\text{CDCl}_3$ )  $\delta$  8.37 (d,  $J$  = 8.4 Hz, 1H), 8.28 (d,  $J$  = 7.9 Hz, 1H), 7.61 (t,  $J$  = 7.3 Hz, 1H), 7.54 (t,  $J$  = 7.5 Hz, 2H), 7.48 – 7.43 (m, 3H), 7.40 (d,  $J$  = 7.4 Hz, 1H), 7.36 (d,  $J$  = 8.4 Hz, 2H), 7.11 (d,  $J$  = 8.2 Hz, 2H), 6.95 (d,  $J$  = 8.9 Hz, 2H), 6.72 (d,  $J$  = 8.9 Hz, 2H), 6.65 (s, 1H), 3.94 (q,  $J$  = 6.9 Hz, 2H), 2.33 (s, 3H), 1.36 (t,  $J$  = 7.0 Hz, 3H);  $^{13}\text{C}$  NMR (100 MHz,  $\text{CDCl}_3$ )  $\delta$  161.5, 155.7, 145.5, 139.1, 136.6, 135.5, 131.7, 130.6, 130.4, 130.1, 129.7, 128.6, 128.5, 127.0, 126.0, 124.9, 122.2, 121.2, 118.4, 115.2, 114.7, 63.7, 21.7, 14.9; HRMS (ESI-TOF) Calcd. for  $\text{C}_{30}\text{H}_{27}\text{N}_2\text{O}_4\text{S}^+$   $[\text{M}+\text{H}]^+$ : 511.1686; found: 511.1691.

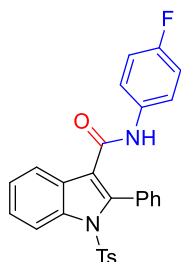

***N*-(4-fluorophenyl)-2-phenyl-1-tosyl-1*H*-indole-3-carboxamide (3af).** The product was purified by column chromatography (petroleum ether / ethyl acetate = 5:1); White solid, 79.4 mg, 82% yield, mp 152 – 154 °C;  $^1\text{H}$  NMR (400 MHz,  $\text{CDCl}_3$ )  $\delta$  8.38 (d,  $J$  = 8.4 Hz, 1H), 8.28 (d,  $J$  = 7.9 Hz, 1H), 7.63 (t,  $J$  = 7.5 Hz, 1H), 7.54 (t,  $J$  = 7.5 Hz, 2H), 7.49 – 7.43 (m, 3H), 7.42 – 7.34 (m, 3H), 7.12 (d,  $J$  = 8.0 Hz, 2H), 7.03 – 6.95 (m, 2H), 6.87 (t,  $J$  = 8.5 Hz, 2H), 6.72 (s, 1H), 2.34 (s, 3H);  $^{13}\text{C}$  NMR (100 MHz,  $\text{CDCl}_3$ )  $\delta$  161.6, 159.2 (d,  $J$  = 243.5 Hz, 1C), 145.6, 139.3, 136.5, 135.5, 133.6 (d,  $J$  = 2.9 Hz, 1C), 131.7, 130.5, 130.0, 129.8, 128.7, 128.3, 127.0, 126.1, 124.9, 122.2, 121.2 (d,  $J$  = 7.9 Hz, 1C), 118.0, 115.5 (d,  $J$  = 22.4 Hz, 1C), 115.2, 21.7; HRMS (ESI-TOF) Calcd. for  $\text{C}_{28}\text{H}_{22}\text{FN}_2\text{O}_3\text{S}^+$   $[\text{M}+\text{H}]^+$ : 485.1330; found: 485.1328.

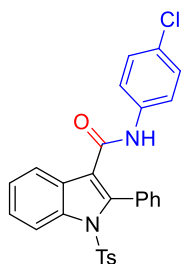

***N*-(4-chlorophenyl)-2-phenyl-1-tosyl-1*H*-indole-3-carboxamide (3ag).** The product was purified by column chromatography (petroleum ether / ethyl acetate = 5:1); White solid, 59.1 mg, 59% yield, mp 197 – 199 °C; <sup>1</sup>H NMR (400 MHz, CDCl<sub>3</sub>) δ 8.38 (d, *J* = 8.3 Hz, 1H), 8.29 (d, *J* = 7.3 Hz, 1H), 7.64 (t, *J* = 7.5 Hz, 1H), 7.55 (t, *J* = 7.6 Hz, 2H), 7.50 – 7.43 (m, 3H), 7.41 (t, *J* = 7.0 Hz, 1H), 7.36 (d, *J* = 8.4 Hz, 2H), 7.15 – 7.10 (m, 4H), 6.96 (d, *J* = 8.8 Hz, 2H), 6.70 (s, 1H), 2.34 (s, 3H); <sup>13</sup>C NMR (100 MHz, CDCl<sub>3</sub>) δ 161.7, 145.6, 139.4, 136.5, 136.2, 135.5, 131.7, 130.6, 130.0, 129.9, 129.1, 128.9, 128.7, 128.2, 127.0, 126.1, 125.0, 122.2, 120.6, 117.9, 115.2, 21.7; HRMS (ESI-TOF) Calcd. for C<sub>28</sub>H<sub>22</sub>ClN<sub>2</sub>O<sub>3</sub>S<sup>+</sup> [M+H]<sup>+</sup>: 501.1034; found: 501.1033.

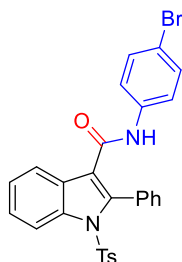

***N*-(4-bromophenyl)-2-phenyl-1-tosyl-1*H*-indole-3-carboxamide (3ah).** The product was purified by column chromatography (petroleum ether / ethyl acetate = 5:1); White solid, 63.1 mg, 58% yield, mp 188 – 191 °C; <sup>1</sup>H NMR (400 MHz, CDCl<sub>3</sub>) δ 8.37 (d, *J* = 8.4 Hz, 1H), 8.29 (d, *J* = 7.0 Hz, 1H), 7.66 – 7.61 (m, 1H), 7.55 (t, *J* = 7.6 Hz, 2H), 7.50 – 7.43 (m, 3H), 7.42 – 7.33 (m, 3H), 7.28 (d, *J* = 8.8 Hz, 2H), 7.12 (d, *J* = 8.2 Hz, 2H), 6.91 (d, *J* = 8.8 Hz, 2H), 6.70 (s, 1H), 2.34 (s, 3H); <sup>13</sup>C NMR (100 MHz, CDCl<sub>3</sub>) δ 161.7, 145.6, 139.4, 136.7, 136.5, 135.5, 131.8, 131.7, 130.6, 130.0, 129.8, 128.7, 128.2, 127.0, 126.1, 125.0, 122.2, 120.9, 117.8, 116.6, 115.2, 21.7; HRMS (ESI-TOF) Calcd. for C<sub>28</sub>H<sub>22</sub>BrN<sub>2</sub>O<sub>3</sub>S<sup>+</sup> [M+H]<sup>+</sup>: 545.0529; found: 545.0523.



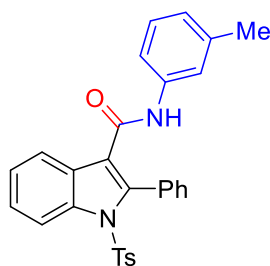

**2-phenyl-N-(*m*-tolyl)-1-tosyl-1*H*-indole-3-carboxamide (3ai).** The product was purified by column chromatography (petroleum ether / ethyl acetate = 5:1); White solid, 64.3 mg, 67% yield, mp 159 – 161 °C;  $^1\text{H}$  NMR (400 MHz,  $\text{CDCl}_3$ )  $\delta$  8.39 (d,  $J$  = 8.3 Hz, 1H), 8.31 (d,  $J$  = 7.8 Hz, 1H), 7.63 (t,  $J$  = 7.4 Hz, 1H), 7.55 (t,  $J$  = 7.5 Hz, 2H), 7.50 – 7.43 (m, 3H), 7.42 (d,  $J$  = 7.3 Hz, 1H), 7.37 (d,  $J$  = 8.4 Hz, 2H), 7.13 (d,  $J$  = 8.2 Hz, 2H), 7.06 (t,  $J$  = 7.8 Hz, 1H), 7.01 (s, 1H), 6.83 (d,  $J$  = 7.5 Hz, 1H), 6.74 – 6.67 (m, 2H), 2.34 (s, 3H), 2.26 (s, 3H);  $^{13}\text{C}$  NMR (100 MHz,  $\text{CDCl}_3$ )  $\delta$  161.7, 145.5, 139.2, 138.8, 137.5, 136.5, 135.5, 131.7, 130.5, 130.1, 129.8, 128.7, 128.4, 127.0, 126.0, 125.0, 124.9, 122.3, 120.2, 118.3, 116.5, 115.2, 21.7, 21.5; HRMS (ESI-TOF) Calcd. for  $\text{C}_{29}\text{H}_{25}\text{N}_2\text{O}_3\text{S}^+ [\text{M}+\text{H}]^+$ : 481.1580; found: 481.1586.

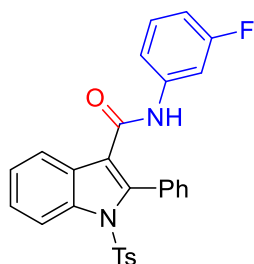

**N-(3-fluorophenyl)-2-phenyl-1-tosyl-1*H*-indole-3-carboxamide (3aj).** The product was purified by column chromatography (petroleum ether / ethyl acetate = 5:1); White solid, 54.2 mg, 56% yield, mp 155 – 157 °C;  $^1\text{H}$  NMR (400 MHz,  $\text{CDCl}_3$ )  $\delta$  8.38 (d,  $J$  = 8.4 Hz, 1H), 8.31 (d,  $J$  = 7.8 Hz, 1H), 7.65 (t,  $J$  = 7.4 Hz, 1H), 7.56 (t,  $J$  = 7.6 Hz, 2H), 7.49 – 7.41 (m, 4H), 7.37 (d,  $J$  = 8.3 Hz, 2H), 7.14 – 7.07 (m, 4H), 6.77 (s, 1H), 6.70 (td,  $J$  = 8.3, 2.5 Hz, 1H), 6.50 (d,  $J$  = 8.0 Hz, 1H), 2.34 (s, 3H);  $^{13}\text{C}$  NMR (100 MHz,  $\text{CDCl}_3$ )  $\delta$  162.9 (d,  $J$  = 244.7 Hz, 1C), 161.7, 145.6, 139.4, 139.0 (d,  $J$  = 10.9 Hz, 1C), 136.5, 135.5, 131.6, 130.7, 129.92, 129.91 (d,  $J$  = 9.4 Hz, 1C), 129.8, 128.7, 128.2, 127.0, 126.1, 125.0, 122.2, 117.7, 115.2, 114.6 (d,  $J$  = 2.9 Hz, 1C), 110.8 (d,  $J$  = 21.2 Hz, 1C), 106.9 (d,  $J$  = 26.5 Hz, 1C), 21.7; HRMS (ESI-TOF) Calcd. For  $\text{C}_{28}\text{H}_{22}\text{FN}_2\text{O}_3\text{S}^+ [\text{M}+\text{H}]^+$ : 485.1330; found: 485.1329.

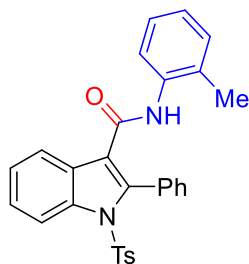

**2-phenyl-*N*-(*o*-tolyl)-1-tosyl-1*H*-indole-3-carboxamide (3ak).** The product was purified by column chromatography (petroleum ether / ethyl acetate = 5:1); White solid, 43.2 mg, 45% yield, mp 123 – 125 °C;  $^1\text{H}$  NMR (400 MHz,  $\text{CDCl}_3$ )  $\delta$  8.39 (d,  $J$  = 8.4 Hz, 1H), 8.25 (d,  $J$  = 7.9 Hz, 1H), 7.90 (d,  $J$  = 8.2 Hz, 1H), 7.61 – 7.53 (m, 1H), 7.52 – 7.44 (m, 5H), 7.40 (t,  $J$  = 7.0 Hz, 1H), 7.32 (d,  $J$  = 8.1 Hz, 2H), 7.19 – 7.13 (m, 1H), 7.11 (d,  $J$  = 8.2 Hz, 2H), 7.02 (d,  $J$  = 5.8 Hz, 1H), 6.99 (d,  $J$  = 7.2 Hz, 1H), 6.71 (s, 1H), 2.34 (s, 3H), 1.58 (s, 3H);  $^{13}\text{C}$  NMR (100 MHz,  $\text{CDCl}_3$ )  $\delta$  162.0, 145.5, 139.0, 136.7, 135.6, 135.4, 131.8, 130.5, 130.3, 129.9, 129.7, 128.6, 128.2, 126.9, 126.7, 126.0, 125.0, 124.8, 122.2, 122.1, 118.6, 115.4, 21.7, 17.0; HRMS (ESI-TOF) Calcd. for  $\text{C}_{29}\text{H}_{25}\text{N}_2\text{O}_3\text{S}^+$   $[\text{M}+\text{H}]^+$ : 481.1580; found: 481.1586.

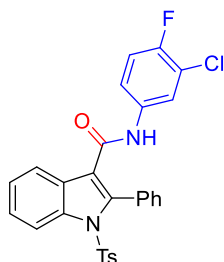

***N*-(3-chloro-4-fluorophenyl)-2-phenyl-1-tosyl-1*H*-indole-3-carboxamide (3al).** The product was purified by column chromatography (petroleum ether / ethyl acetate = 5:1); White solid, 73.6 mg, 71% yield, mp 166 – 168 °C;  $^1\text{H}$  NMR (400 MHz,  $\text{CDCl}_3$ )  $\delta$  8.37 (d,  $J$  = 8.4 Hz, 1H), 8.28 (d,  $J$  = 7.9 Hz, 1H), 7.65 (t,  $J$  = 7.5 Hz, 1H), 7.56 (t,  $J$  = 7.6 Hz, 2H), 7.49 – 7.41 (m, 4H), 7.36 (d,  $J$  = 8.1 Hz, 2H), 7.32 (d,  $J$  = 4.7 Hz, 1H), 7.13 (d,  $J$  = 8.1 Hz, 2H), 6.92 (t,  $J$  = 8.8 Hz, 1H), 6.68 – 6.65 (m, 2H), 2.34 (s, 3H);  $^{13}\text{C}$  NMR (100 MHz,  $\text{CDCl}_3$ )  $\delta$  161.7, 154.6 (d,  $J$  = 246.0 Hz, 1C), 145.7, 139.4, 136.4, 135.5, 134.2 (d,  $J$  = 3.4 Hz, 1C), 131.6, 130.7, 130.0, 129.8, 128.8, 128.1, 127.0, 126.2, 125.0, 122.1, 121.6, 121.0 (d,  $J$  = 18.5 Hz, 1C), 118.9 (d,  $J$  = 6.9 Hz), 117.6, 116.5 (d,  $J$  = 22.0 Hz, 1C), 115.2, 21.7; HRMS (ESI-TOF) Calcd. for  $\text{C}_{28}\text{H}_{21}\text{ClFN}_2\text{O}_3\text{S}^+$   $[\text{M}+\text{H}]^+$ : 519.0940; found: 519.0949.

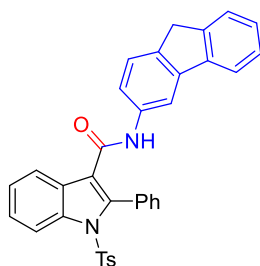

***N*-(9*H*-fluoren-3-yl)-2-phenyl-1-tosyl-1*H*-indole-3-carboxamide (3am).** The product was purified by column chromatography (petroleum ether / ethyl acetate = 5:1); White solid, 70.9 mg, 64% yield, mp 173 – 176; <sup>1</sup>H NMR (400 MHz, CDCl<sub>3</sub>)  $\delta$  8.41 (d, *J* = 8.3 Hz, 1H), 8.35 (d, *J* = 7.8 Hz, 1H), 7.72 – 7.60 (m, 1H), 7.61 – 7.51 (m, 3H), 7.49 (d, *J* = 7.4 Hz, 4H), 7.44 (d, *J* = 7.3 Hz, 1H), 7.38 (d, *J* = 8.3 Hz, 2H), 7.33 (t, *J* = 7.4 Hz, 1H), 7.25 – 7.23 (m, 1H), 7.13 (d, *J* = 8.2 Hz, 2H), 6.85 (s, 1H), 6.67 (d, *J* = 7.5 Hz, 1H), 3.81 (s, 2H), 2.34 (s, 3H); <sup>13</sup>C NMR (100 MHz, CDCl<sub>3</sub>)  $\delta$  161.6, 145.6, 144.3, 143.2, 141.3, 139.2, 138.0, 136.6, 136.4, 135.5, 131.7, 130.5, 130.1, 129.8, 128.7, 128.4, 127.0, 126.8, 126.3, 126.0, 125.0, 124.9, 122.3, 120.0, 119.5, 118.3, 118.1, 116.4, 115.2, 37.1, 21.7; HRMS (ESI-TOF) Calcd. for C<sub>35</sub>H<sub>27</sub>N<sub>2</sub>O<sub>3</sub>S<sup>+</sup> [M+H]<sup>+</sup>: 555.1737; found: 555.1738.

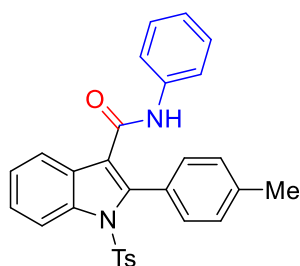

***N*-phenyl-2-(*p*-tolyl)-1-tosyl-1*H*-indole-3-carboxamide (3ba).** The product was purified by column chromatography (petroleum ether / ethyl acetate = 5:1); White solid, 49.0 mg, 51% yield, mp 151 – 152 °C; <sup>1</sup>H NMR (400 MHz, CDCl<sub>3</sub>)  $\delta$  8.38 (d, *J* = 8.3 Hz, 1H), 8.32 (d, *J* = 7.7 Hz, 1H), 7.46 (td, 1H), 7.42 – 7.38 (m, 2H), 7.38 – 7.36 (m, 5H), 7.20 (t, *J* = 7.9 Hz, 2H), 7.13 (d, *J* = 8.1 Hz, 2H), 7.06 – 7.00 (m, 3H), 6.81 (s, 1H), 2.52 (s, 3H), 2.34 (s, 3H); <sup>13</sup>C NMR (100 MHz, CDCl<sub>3</sub>)  $\delta$  161.8, 145.5, 140.8, 139.6, 137.7, 136.5, 135.5, 131.5, 129.7, 129.4, 128.9, 128.5, 127.0, 126.9, 125.9, 124.9, 124.1, 122.2, 119.5, 118.0, 115.2, 21.7; HRMS (ESI-TOF) Calcd. for C<sub>29</sub>H<sub>25</sub>N<sub>2</sub>O<sub>3</sub>S<sup>+</sup> [M+H]<sup>+</sup>: 481.1580; found: 481.1589.

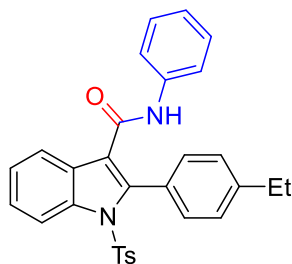

**2-(4-ethylphenyl)-N-phenyl-1-tosyl-1H-indole-3-carboxamide (3ca).** The product was purified by column chromatography (petroleum ether / ethyl acetate = 5:1); White solid, 55.4 mg, 56% yield, mp 130 – 132 °C;  $^1\text{H}$  NMR (400 MHz,  $\text{CDCl}_3$ )  $\delta$  8.37 (d,  $J$  = 8.4 Hz, 1H), 8.33 (d,  $J$  = 7.8 Hz, 1H), 7.46 (t,  $J$  = 7.8 Hz, 1H), 7.44 – 7.36 (m, 2H), 7.37 (m, 5H), 7.18 (m,  $J$  = 7.8, 5.7 Hz, 2H), 7.12 (d,  $J$  = 6.8 Hz, 2H), 7.02 – 6.98 (m, 3H), 6.76 (s, 1H), 2.85 – 2.78 (m, 2H), 2.34 (s, 3H), 1.36 (td,  $J$  = 7.6, 2.5 Hz, 3H);  $^{13}\text{C}$  NMR (100 MHz,  $\text{CDCl}_3$ )  $\delta$  161.8, 147.1, 145.5, 139.6, 137.7, 136.5, 135.6, 131.7, 129.7, 128.8, 128.4, 128.3, 127.2, 127.0, 125.9, 124.9, 124.0, 122.3, 119.4, 118.0, 115.2, 29.0, 21.7, 15.7; HRMS (ESI-TOF) Calcd. for  $\text{C}_{30}\text{H}_{27}\text{N}_2\text{O}_3\text{S}^+$   $[\text{M}+\text{H}]^+$ : 495.1737; found: 495.1738.

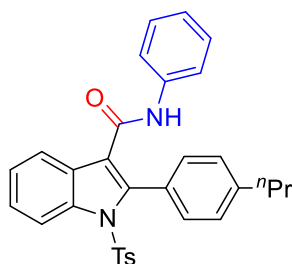

**N-phenyl-2-(4-propylphenyl)-1-tosyl-1H-indole-3-carboxamide (3da).** The product was purified by column chromatography (petroleum ether / ethyl acetate = 5:1); White solid, 51.8 mg, 51% yield, mp 135 – 137 °C;  $^1\text{H}$  NMR (400 MHz,  $\text{CDCl}_3$ )  $\delta$  8.38 (d,  $J$  = 8.8 Hz, 1H), 8.34 (d,  $J$  = 7.7 Hz, 1H), 7.49 – 7.44 (m, 1H), 7.43 – 7.40 (m, 1H), 7.39 – 7.34 (m, 6H), 7.21 – 7.15 (m, 2H), 7.13 (d,  $J$  = 8.4 Hz, 2H), 7.05 – 6.98 (m, 3H), 6.80 (s, 1H), 2.76 (td,  $J$  = 8.4, 7.7, 2.6 Hz, 2H), 2.35 (s, 3H), 1.80 – 1.74 (m, 2H), 1.04 (td,  $J$  = 7.4, 2.6 Hz, 3H);  $^{13}\text{C}$  NMR (100 MHz,  $\text{CDCl}_3$ )  $\delta$  161.8, 145.6, 145.5, 139.6, 137.7, 136.5, 135.6, 131.6, 129.7, 128.8, 128.4, 127.1, 127.0, 125.9, 124.8, 124.0, 122.3, 119.3, 117.9, 115.2, 38.0, 24.6, 21.6, 13.9; HRMS (ESI-TOF) Calcd. for  $\text{C}_{31}\text{H}_{29}\text{N}_2\text{O}_3\text{S}^+$   $[\text{M}+\text{H}]^+$ : 509.1893; found: 509.1897.

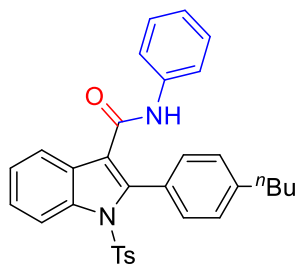

**2-(4-butylphenyl)-N-phenyl-1-tosyl-1H-indole-3-carboxamide (3ea).** The product was purified by column chromatography (petroleum ether / ethyl acetate = 5:1); White solid, 52.3 mg, 50% yield, mp 177 – 179 °C;  $^1\text{H}$  NMR (400 MHz,  $\text{CDCl}_3$ )  $\delta$  8.38 (d,  $J$  = 8.5 Hz, 1H), 8.34 (d,  $J$  = 7.6 Hz, 1H), 7.46 (td, 1H), 7.40 (t,  $J$  = 7.5 Hz, 1H), 7.38 – 7.35 (m, 6H), 7.18 (t,  $J$  = 7.9 Hz, 2H), 7.12 (d,  $J$  = 8.2 Hz, 2H), 7.05 – 6.98 (m, 3H), 6.79 (s, 1H), 2.78 (t,  $J$  = 7.7 Hz, 2H), 2.34 (s, 3H), 1.72 (p,  $J$  = 7.5 Hz, 2H), 1.44 (h,  $J$  = 7.4 Hz, 2H), 1.00 (t,  $J$  = 7.3 Hz, 3H);  $^{13}\text{C}$  NMR (100 MHz,  $\text{CDCl}_3$ )  $\delta$  161.8, 145.8, 145.5, 139.6, 137.7, 136.5, 135.6, 131.6, 129.7, 128.8, 128.4, 127.1, 127.0, 125.9, 124.8, 124.0, 122.3, 119.4, 117.9, 115.2, 35.7, 33.7, 22.4, 21.7, 14.1; HRMS (ESI-TOF) Calcd. for  $\text{C}_{32}\text{H}_{31}\text{N}_2\text{O}_3\text{S}^+$   $[\text{M}+\text{H}]^+$ : 523.2050; found: 523.2052.

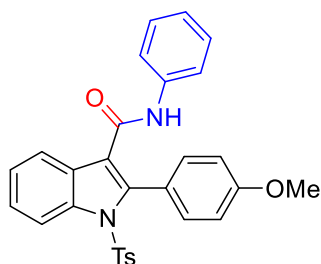

**2-(4-methoxyphenyl)-N-phenyl-1-tosyl-1H-indole-3-carboxamide (3fa).** The product was purified by column chromatography (petroleum ether / ethyl acetate = 3:1); Yellow solid, 52.6 mg, 53% yield, mp 203 – 204 °C;  $^1\text{H}$  NMR (400 MHz,  $\text{CDCl}_3$ )  $\delta$  8.38 (d,  $J$  = 8.4 Hz, 1H), 8.30 (d,  $J$  = 7.8 Hz, 1H), 7.45 (t,  $J$  = 7.1 Hz, 1H), 7.40 (d,  $J$  = 7.8 Hz, 1H), 7.38 – 7.33 (m, 4H), 7.21 (t,  $J$  = 7.8 Hz, 2H), 7.14 – 7.08 (m, 4H), 7.05 (d,  $J$  = 8.8 Hz, 2H), 7.01 (t,  $J$  = 7.3 Hz, 1H), 6.88 (s, 1H), 3.93 (s, 3H), 2.34 (s, 3H);  $^{13}\text{C}$  NMR (100 MHz,  $\text{CDCl}_3$ )  $\delta$  161.9, 161.3, 145.5, 139.5, 137.7, 136.6, 135.6, 133.2, 129.7, 128.9, 128.4, 126.9, 125.9, 124.9, 124.2, 122.2, 121.5, 119.6, 118.0, 115.3, 114.1, 55.6, 21.7; HRMS (ESI-TOF) Calcd. for  $\text{C}_{29}\text{H}_{25}\text{N}_2\text{O}_4\text{S}^+$   $[\text{M}+\text{H}]^+$ : 497.1530; found: 497.1532.

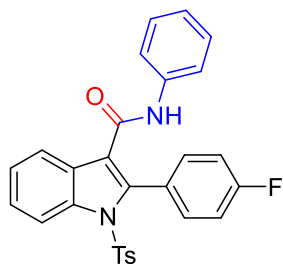

**2-(4-fluorophenyl)-N-phenylbenzofuran-3-carboxamide (3ga).** The product was purified by column chromatography (petroleum ether / ethyl acetate = 5:1); White solid, 48.4 mg, 50% yield, mp 155 – 156 °C;  $^1\text{H}$  NMR (400 MHz,  $\text{CDCl}_3$ )  $\delta$  8.38 (d,  $J$  = 8.4 Hz, 1H), 8.21 (d,  $J$  = 7.9 Hz, 1H), 7.51 – 7.37 (m, 4H), 7.32 (d,  $J$  = 7.3 Hz, 2H), 7.26 – 7.20 (m, 4H), 7.13 – 7.10 (m, 4H), 7.04 (t,  $J$  = 7.4 Hz, 1H), 6.75 (s, 1H), 2.34 (s, 3H);  $^{13}\text{C}$  NMR (100 MHz,  $\text{CDCl}_3$ )  $\delta$  163.9 (d,  $J$  = 252.5 Hz), 161.6, 145.7, 138.1, 137.4, 136.7, 135.4, 133.7 (d,  $J$  = 8.5 Hz, 1C), 129.8, 129.0, 128.2, 126.9, 126.2, 125.8 (d,  $J$  = 3.7 Hz, 1C), 125.0, 124.5, 122.0, 119.5, 118.8, 115.8 (d,  $J$  = 21.9 Hz, 1C), 115.4, 21.7; HRMS (ESI-TOF) Calcd. for  $\text{C}_{28}\text{H}_{22}\text{FN}_2\text{O}_3\text{S}^+$   $[\text{M}+\text{H}]^+$ : 485.1330; found: 485.1335.

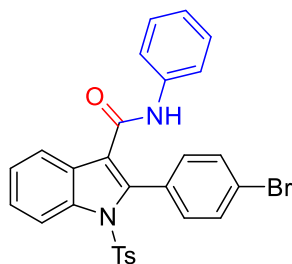

**2-(4-bromophenyl)-N-phenyl-1-tosyl-1H-indole-3-carboxamide (3ha).** The product was purified by column chromatography (petroleum ether / ethyl acetate = 5:1); White solid, 47.9 mg, 44% yield, mp 161 – 164 °C;  $^1\text{H}$  NMR (400 MHz,  $\text{CDCl}_3$ )  $\delta$  8.37 (d,  $J$  = 8.4 Hz, 1H), 8.16 (d,  $J$  = 7.9 Hz, 1H), 7.66 (d,  $J$  = 8.0 Hz, 2H), 7.47 (t,  $J$  = 7.1 Hz, 1H), 7.40 (t,  $J$  = 7.1 Hz, 1H), 7.34 (d,  $J$  = 8.1 Hz, 4H), 7.26 – 7.19 (m, 2H), 7.16 – 7.09 (m, 4H), 7.06 (t,  $J$  = 7.3 Hz, 1H), 6.73 (s, 1H), 2.34 (s, 3H);  $^{13}\text{C}$  NMR (100 MHz,  $\text{CDCl}_3$ )  $\delta$  161.5, 145.7, 138.0, 137.4, 136.7, 135.2, 133.1, 131.7, 129.8, 129.1, 128.8, 128.2, 126.9, 126.3, 125.1, 125.0, 124.5, 121.9, 119.6, 119.0, 115.5, 21.7; HRMS (ESI-TOF) Calcd. for  $\text{C}_{28}\text{H}_{22}\text{BrN}_2\text{O}_3\text{S}^+$   $[\text{M}+\text{H}]^+$ : 545.0529; found: 545.0523.

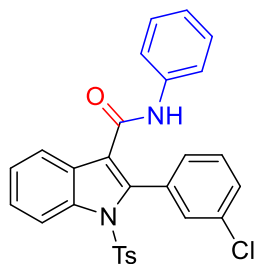

**2-(3-chlorophenyl)-N-phenyl-1-tosyl-1H-indole-3-carboxamide (3ia).** The product was purified by column chromatography (petroleum ether / ethyl acetate = 5:1); White solid, 68.0 mg, 68% yield, mp 150 – 153 °C;  $^1\text{H}$  NMR (400 MHz,  $\text{CDCl}_3$ )  $\delta$  8.33 (d,  $J$  = 8.4 Hz, 1H), 8.25 (d,  $J$  = 7.9 Hz, 1H), 7.61 (d,  $J$  = 8.0 Hz, 1H), 7.56 (t,  $J$  = 7.5 Hz, 1H), 7.51 (s, 1H), 7.50 – 7.38 (m, 5H), 7.22 (t,  $J$  = 7.7 Hz, 2H), 7.19 – 7.12 (m, 4H), 7.04 (t,  $J$  = 7.3 Hz, 1H), 6.93 (s, 1H), 2.36 (s, 3H);  $^{13}\text{C}$  NMR (100 MHz,  $\text{CDCl}_3$ )  $\delta$  161.4, 145.7, 137.6, 136.2, 136.0, 135.5, 133.3, 131.9, 130.0, 129.8, 129.7, 129.0, 127.9, 127.2, 126.9, 126.2, 124.7, 124.4, 122.1, 119.7, 118.6, 114.8, 21.7; HRMS (ESI-TOF) Calcd. For  $\text{C}_{28}\text{H}_{22}\text{ClN}_2\text{O}_3\text{S}^+$   $[\text{M}+\text{H}]^+$ : 501.1034; found: 501.1035.

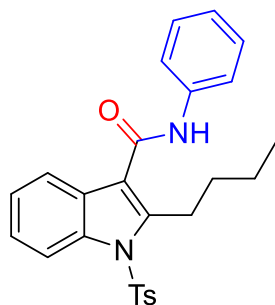

**2-butyl-N-phenyl-1-tosyl-1H-indole-3-carboxamide (3ja).** The product was purified by column chromatography (petroleum ether / ethyl acetate = 5:1); White solid, 38.4 mg, 43% yield, mp 139 – 141 °C;  $^1\text{H}$  NMR (400 MHz,  $\text{CDCl}_3$ )  $\delta$  8.26 (d,  $J$  = 7.3 Hz, 1H), 7.71 – 7.65 (m, 3H), 7.59 (d,  $J$  = 8.0 Hz, 2H), 7.55 (s, 1H), 7.40 – 7.29 (m, 4H), 7.22 (d,  $J$  = 8.2 Hz, 2H), 7.16 (t,  $J$  = 7.4 Hz, 1H), 3.32 (t, 2H), 2.36 (s, 3H), 1.84 – 1.73 (m, 2H), 1.46 (h,  $J$  = 7.4 Hz, 2H), 0.94 (t,  $J$  = 7.3 Hz, 3H);  $^{13}\text{C}$  NMR (100 MHz,  $\text{CDCl}_3$ )  $\delta$  162.6, 145.6, 145.4, 137.8, 136.1, 136.0, 130.1, 129.3, 127.0, 126.5, 124.9, 124.7, 124.4, 120.0, 119.0, 116.6, 115.5, 33.6, 26.9, 22.9, 21.6, 13.8; HRMS (ESI-TOF) Calcd. For  $\text{C}_{26}\text{H}_{27}\text{N}_2\text{O}_3\text{S}^+$   $[\text{M}+\text{H}]^+$ : 447.1737; found: 447.1734.

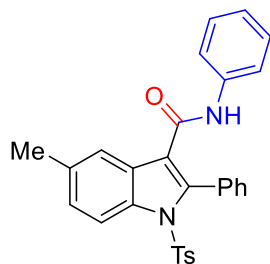

**5-methyl-N,2-diphenyl-1-tosyl-1H-indole-3-carboxamide (3ka).** The product was purified by column chromatography (petroleum ether / ethyl acetate = 5:1); White solid, 42.3 mg, 44% yield; mp 140 – 142 °C;  $^1\text{H}$  NMR (400 MHz,  $\text{CDCl}_3$ )  $\delta$  8.24 (d,  $J$  = 8.6 Hz, 1H), 8.10 (s, 1H), 7.67 – 7.59 (m, 1H), 7.55 (t,  $J$  = 6.7 Hz, 2H), 7.49 – 7.43 (m, 2H), 7.35 (dd,  $J$  = 8.5, 2.1 Hz, 2H), 7.32 – 7.24 (m, 1H), 7.19 (t,  $J$  = 7.0 Hz, 2H), 7.12 (d,  $J$  = 7.2 Hz, 2H), 7.03 – 6.99 (m, 3H), 6.72 (s, 1H), 2.49 (s, 3H), 2.34 (s, 3H);  $^{13}\text{C}$  NMR (100 MHz,  $\text{CDCl}_3$ )  $\delta$  161.8, 145.4, 139.3, 137.6, 135.5, 134.8, 131.7, 130.5, 130.1, 129.7, 128.9, 128.6, 127.4, 126.9, 124.2, 122.0, 119.5, 118.0, 114.9, 21.7, 21.4; HRMS (ESI-TOF) Calcd. for  $\text{C}_{29}\text{H}_{25}\text{N}_2\text{O}_3\text{S}^+$   $[\text{M}+\text{H}]^+$ : 481.1580; found: 481.1579.

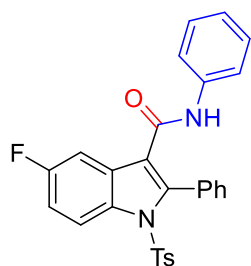

**5-fluoro-N,2-diphenyl-1-tosyl-1H-indole-3-carboxamide (3la).** The product was purified by column chromatography (petroleum ether / ethyl acetate = 5:1); White solid, 48.4 mg, 50% yield; mp 145 – 146 °C;  $^1\text{H}$  NMR (400 MHz,  $\text{CDCl}_3$ )  $\delta$  8.33 (dd,  $J$  = 9.2, 4.5 Hz, 1H), 8.03 (dd,  $J$  = 9.2, 2.7 Hz, 1H), 7.66 (t,  $J$  = 7.5 Hz, 1H), 7.56 (t,  $J$  = 7.6 Hz, 2H), 7.44 (d,  $J$  = 7.2 Hz, 2H), 7.34 (d,  $J$  = 8.4 Hz, 2H), 7.23 – 7.18 (m, 2H), 7.18 – 7.09 (m, 3H), 7.04 – 6.98 (m, 3H), 6.70 (s, 1H), 2.36 (s, 3H);  $^{13}\text{C}$  NMR (100 MHz,  $\text{CDCl}_3$ )  $\delta$  161.3, 160.5 (d,  $J$  = 241.8 Hz, 1C), 145.8, 140.6, 137.4, 135.3, 132.8, 131.6, 130.8, 129.8, 129.7, 129.6, 129.4, 128.9, 128.8, 127.0, 124.3, 119.4, 117.7, 116.4 (d,  $J$  = 9.0 Hz, 1C), 115.4, 114.1 (d,  $J$  = 25.3 Hz, 1C), 108.1 (d,  $J$  = 25.6 Hz, 1C), 21.7; HRMS (ESI-TOF) Calcd. for  $\text{C}_{28}\text{H}_{22}\text{FN}_2\text{O}_3\text{S}^+$   $[\text{M}+\text{H}]^+$ : 485.1330; found: 485.1333.



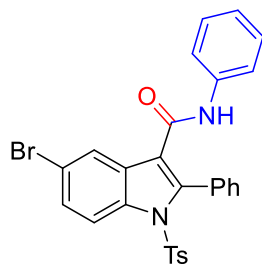

**5-bromo-N,2-diphenyl-1-tosyl-1H-indole-3-carboxamide (3ma).** The product was purified by column chromatography (petroleum ether / ethyl acetate = 5:1); White solid, 57.7 mg, 53% yield, mp 173 – 175 °C;  $^1\text{H}$  NMR (400 MHz,  $\text{CDCl}_3$ )  $\delta$  8.53 (s, 1H), 8.25 (d,  $J$  = 9.0 Hz, 1H), 7.66 (t,  $J$  = 7.5 Hz, 1H), 7.58 – 7.54 (m, 3H), 7.43 (d,  $J$  = 7.3 Hz, 2H), 7.33 (d,  $J$  = 8.3 Hz, 2H), 7.19 (t,  $J$  = 7.8 Hz, 2H), 7.14 (d,  $J$  = 8.3 Hz, 2H), 7.04 – 6.98 (m, 3H), 6.69 (s, 1H), 2.36 (s, 3H);  $^{13}\text{C}$  NMR (100 MHz,  $\text{CDCl}_3$ )  $\delta$  161.2, 145.9, 140.2, 137.4, 135.3, 135.2, 131.7, 130.8, 130.0, 129.9, 129.5, 129.0, 128.9, 128.8, 127.0, 125.1, 124.3, 119.5, 118.6, 117.2, 116.6, 21.7. HRMS (ESI-TOF) Calcd. for  $\text{C}_{28}\text{H}_{22}\text{BrN}_2\text{O}_3\text{S}^+$   $[\text{M}+\text{H}]^+$ : 545.0529; found: 545.0523.

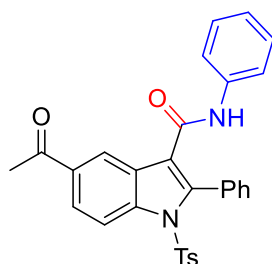

**5-acetyl-N,2-diphenyl-1-tosyl-1H-indole-3-carboxamide (3na).** The product was purified by column chromatography (petroleum ether / ethyl acetate = 3:1); White solid, 53.9 mg, 53% yield, mp 199 – 201 °C;  $^1\text{H}$  NMR (400 MHz,  $\text{CDCl}_3$ )  $\delta$  8.96 (s, 1H), 8.44 (d,  $J$  = 8.9 Hz, 1H), 8.12 (dd,  $J$  = 8.9, 1.9 Hz, 1H), 7.67 (t,  $J$  = 7.5 Hz, 1H), 7.57 (t,  $J$  = 7.6 Hz, 2H), 7.45 (d,  $J$  = 7.0 Hz, 2H), 7.36 (d,  $J$  = 8.4 Hz, 2H), 7.20 (t,  $J$  = 7.9 Hz, 2H), 7.14 (d,  $J$  = 8.2 Hz, 2H), 7.05 – 7.01 (m, 3H), 6.76 (s, 1H), 2.71 (s, 3H), 2.36 (s, 3H);  $^{13}\text{C}$  NMR (100 MHz,  $\text{CDCl}_3$ )  $\delta$  198.1, 161.3, 146.0, 140.4, 138.9, 137.3, 135.3, 134.1, 131.6, 130.9, 129.9, 129.4, 129.0, 128.8, 128.1, 127.0, 125.6, 124.4, 124.0, 119.6, 118.0, 115.2, 26.9, 21.7. HRMS (ESI-TOF) Calcd. for  $\text{C}_{30}\text{H}_{25}\text{N}_2\text{O}_4\text{S}^+$   $[\text{M}+\text{H}]^+$ : 509.1530; found: 509.1534.

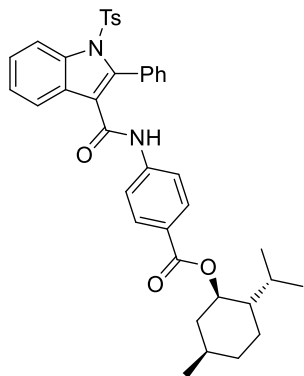

**Compound (6).** The product was purified by column chromatography (petroleum ether / ethyl acetate = 5:1); Yellow solid, 55.8 mg, 43% yield, mp 160– 163 °C;  $^1\text{H}$  NMR (400 MHz,  $\text{CDCl}_3$ )  $\delta$  8.38 (d,  $J$  = 8.3 Hz, 1H), 8.32 (d,  $J$  = 7.9 Hz, 1H), 7.87 (d,  $J$  = 8.6 Hz, 2H), 7.66 (t,  $J$  = 7.4 Hz, 1H), 7.56 (t,  $J$  = 7.5 Hz, 2H), 7.50 – 7.40 (m, 4H), 7.37 (d,  $J$  = 8.3 Hz, 2H), 7.13 (d,  $J$  = 8.2 Hz, 2H), 7.07 (d,  $J$  = 8.7 Hz, 2H), 6.87 (s, 1H), 4.87 (td,  $J$  = 10.9, 4.4 Hz, 1H), 2.34 (s, 3H), 2.08 (d,  $J$  = 12.0 Hz, 1H), 1.94 – 1.87 (m, 1H), 1.71 (d,  $J$  = 11.6 Hz, 2H), 1.56 – 1.48 (m, 2H), 1.16 – 1.01 (m, 2H), 0.90 (t,  $J$  = 7.0 Hz, 7H), 0.76 (d,  $J$  = 6.9 Hz, 3H);  $^{13}\text{C}$  NMR (100 MHz,  $\text{CDCl}_3$ )  $\delta$  165.6, 161.8, 145.7, 141.5, 139.6, 136.5, 135.5, 131.7, 130.7, 129.9, 129.8, 128.8, 128.2, 127.0, 126.2, 125.0, 122.3, 118.4, 117.7, 115.2, 74.7, 47.3, 41.1, 34.4, 31.5, 26.6, 23.7, 22.1, 21.7, 20.8, 16.6.

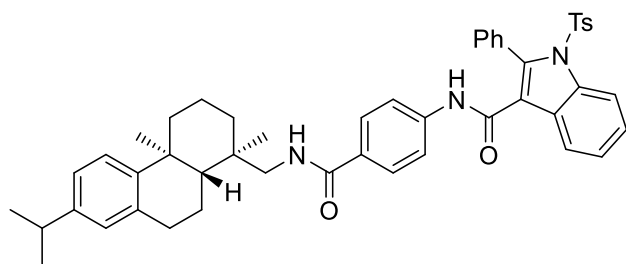

**Compound (8).** The product was purified by column chromatography (petroleum ether / ethyl acetate = 2:1); White solid, 62.2 mg, 40% yield, mp 165 – 167 °C;  $^1\text{H}$  NMR (400 MHz,  $\text{CDCl}_3$ )  $\delta$  8.37 (d,  $J$  = 8.4 Hz, 1H), 8.30 (d,  $J$  = 7.8 Hz, 1H), 7.64 (t,  $J$  = 7.4 Hz, 1H), 7.54 (t,  $J$  = 7.4 Hz, 4H), 7.48 – 7.45 (m, 2H), 7.43 – 7.38 (m, 2H), 7.38 – 7.37 (m, 1H), 7.35 (s, 1H), 7.17 (d,  $J$  = 8.2 Hz, 1H), 7.12 (d,  $J$  = 8.2 Hz, 2H), 7.04 (d,  $J$  = 8.6 Hz, 2H), 7.00 (d,  $J$  = 8.2 Hz, 1H), 6.88 (s, 1H), 6.86 (s, 1H), 6.08 (t,  $J$  = 6.2 Hz, 1H), 3.37 (dd,  $J$  = 13.6, 6.3 Hz, 1H), 3.27 (dd,  $J$  = 13.7, 6.5 Hz, 1H), 2.91 (dd,  $J$  = 17.0, 6.2 Hz, 1H), 2.86 – 2.75 (m, 2H), 2.34 (s, 3H), 2.29 (d,  $J$  = 13.2 Hz, 1H), 1.96 – 1.92 (m, 1H), 1.79 – 1.68 (m, 3H), 1.47 (t,  $J$  = 11.1 Hz, 2H), 1.41 – 1.32 (m, 2H), 1.23 (d,  $J$  =

4.5 Hz, 6H), 1.22 (s, 3H), 0.98 (s, 3H);  $^{13}\text{C}$  NMR (100 MHz,  $\text{CDCl}_3$ )  $\delta$  166.9, 161.8, 147.1, 145.7, 145.6, 140.4, 139.6, 136.5, 135.5, 134.8, 131.7, 130.7, 130.1, 129.9, 129.8, 128.8, 128.2, 127.8, 127.02, 126.96, 126.1, 125.0, 124.3, 123.9, 122.2, 118.8, 117.8, 115.2, 50.3, 45.9, 38.4, 37.8, 37.6, 36.5, 33.5, 30.5, 25.5, 24.0, 21.7, 19.1, 18.8, 18.7.

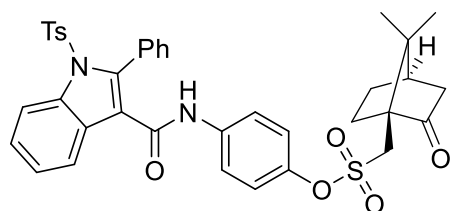

**Compound (11).** The product was purified by column chromatography (petroleum ether / ethyl acetate = 2:1); White solid, 47.3 mg, 34% yield, mp 185 – 187 °C;  $^1\text{H}$  NMR (400 MHz,  $\text{CDCl}_3$ )  $\delta$  8.37 (d,  $J$  = 8.3 Hz, 1H), 8.30 (d,  $J$  = 7.9 Hz, 1H), 7.65 (t,  $J$  = 7.5 Hz, 1H), 7.56 (t,  $J$  = 7.6 Hz, 2H), 7.50 – 7.45 (m, 2H), 7.44 – 7.38 (m, 2H), 7.36 (d,  $J$  = 8.4 Hz, 2H), 7.12 (d,  $J$  = 9.1 Hz, 4H), 7.05 (d,  $J$  = 9.1 Hz, 2H), 6.78 (s, 1H), 3.74 (d,  $J$  = 15.0 Hz, 1H), 3.13 (d,  $J$  = 15.0 Hz, 1H), 2.55 – 2.46 (m, 1H), 2.40 (dt,  $J$  = 18.5, 4.1 Hz, 1H), 2.34 (s, 3H), 2.12 (t,  $J$  = 4.5 Hz, 1H), 2.10 – 2.01 (m, 1H), 1.95 (d,  $J$  = 18.5 Hz, 1H), 1.72 – 1.65 (m, 1H), 1.48 – 1.39 (m, 1H), 1.13 (s, 3H), 0.88 (s, 3H);  $^{13}\text{C}$  NMR (100 MHz,  $\text{CDCl}_3$ )  $\delta$  214.1, 161.7, 145.6, 145.0, 139.4, 136.5, 136.5, 135.5, 131.6, 130.7, 129.9, 129.8, 128.8, 128.2, 127.0, 126.1, 125.0, 122.6, 122.2, 120.6, 117.7, 115.2, 58.2, 48.0, 47.5, 42.9, 42.5, 26.9, 25.2, 21.7, 20.0, 19.7.

## 5. References

- [1] C. Koradin, W. Dohle, A. L. Rodriguez, B. Schmid and P. Knochel, Synthesis of polyfunctional indoles and related heterocycles mediated by cesium and potassium bases, *Tetrahedron Lett.*, 2004, **45**, 539–541.
- [2] A. Mizukami, Y. Ise, T. Kimachi, and K. Inamoto, Rhodium-catalyzed cyclization of 2-ethynylanilines in the presence of isocyanates: approach toward indole-3-carboxamides, *Org. Lett.*, 2016, **18**, 748–751.

6.  $^1\text{H}$ ,  $^{13}\text{C}$  spectra of compounds 3aa–am, 3ba–na, 6, 8, and 11

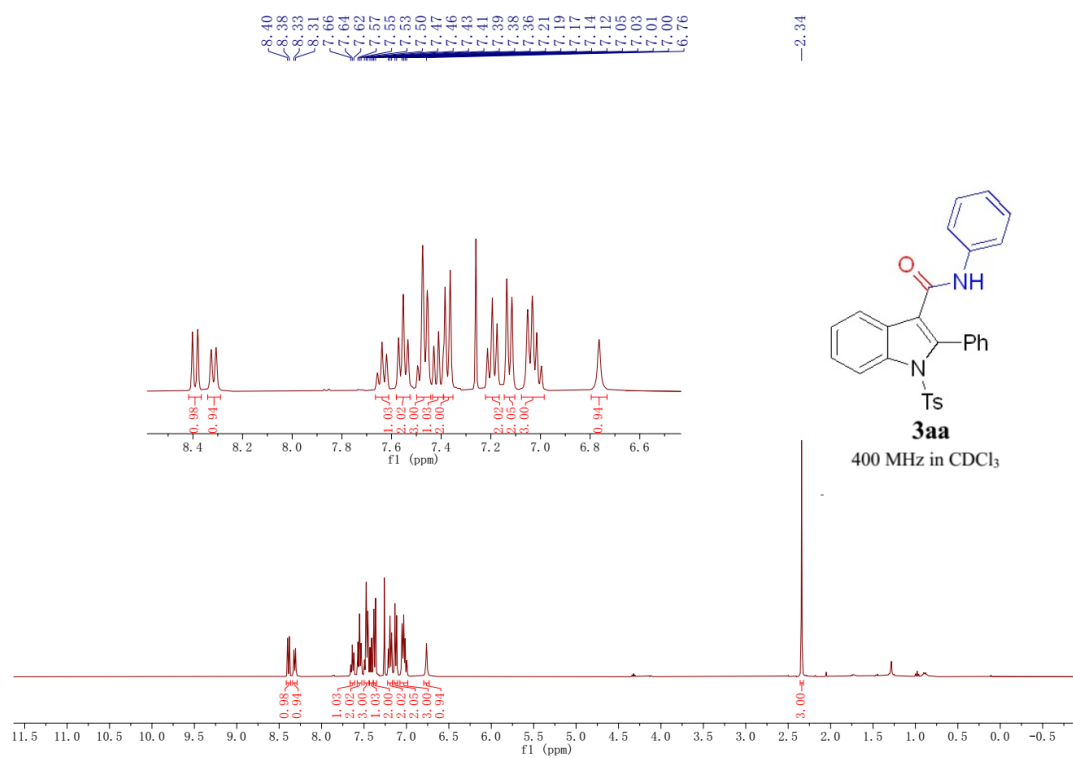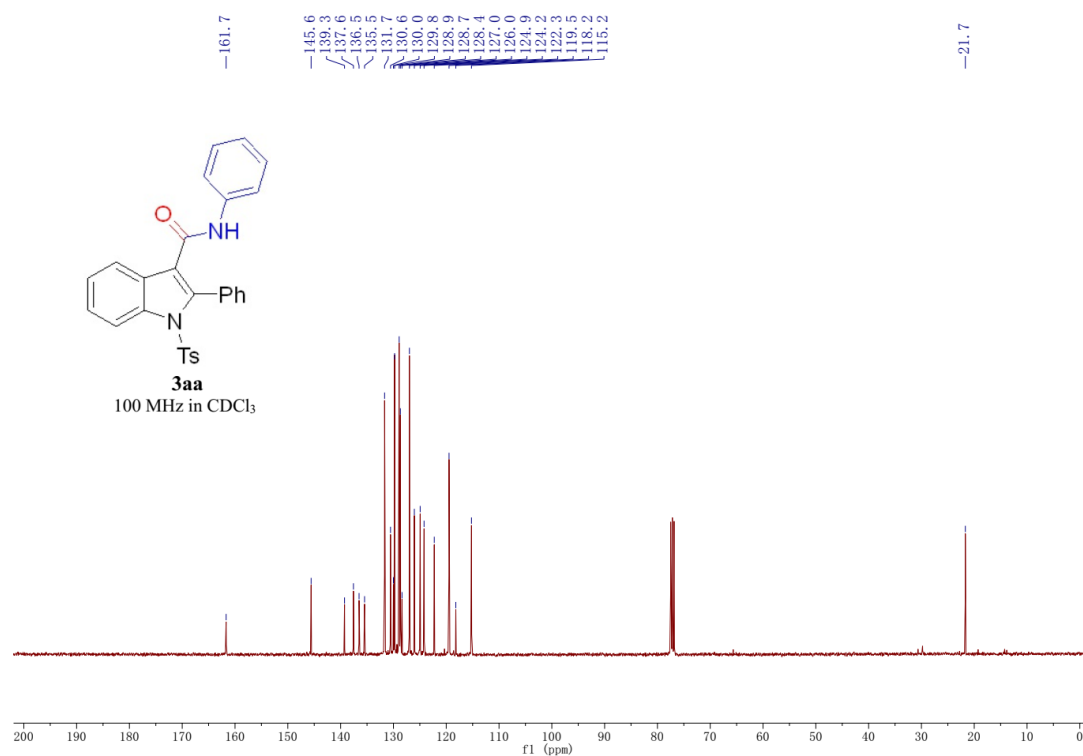

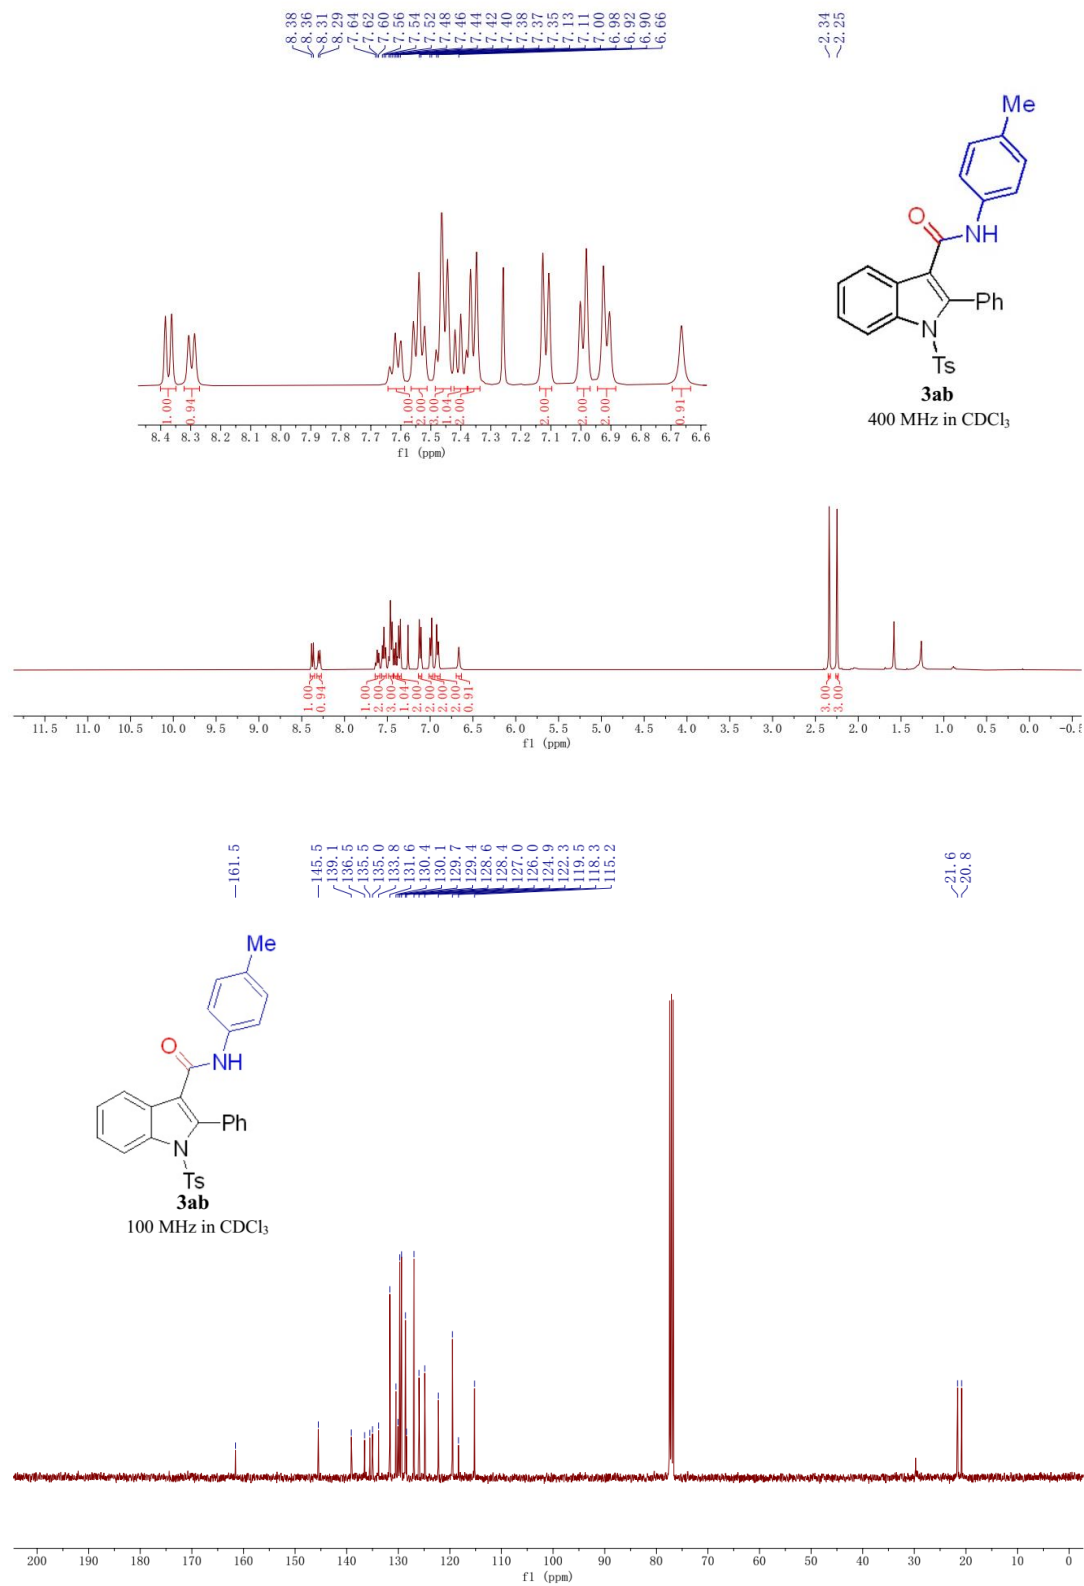

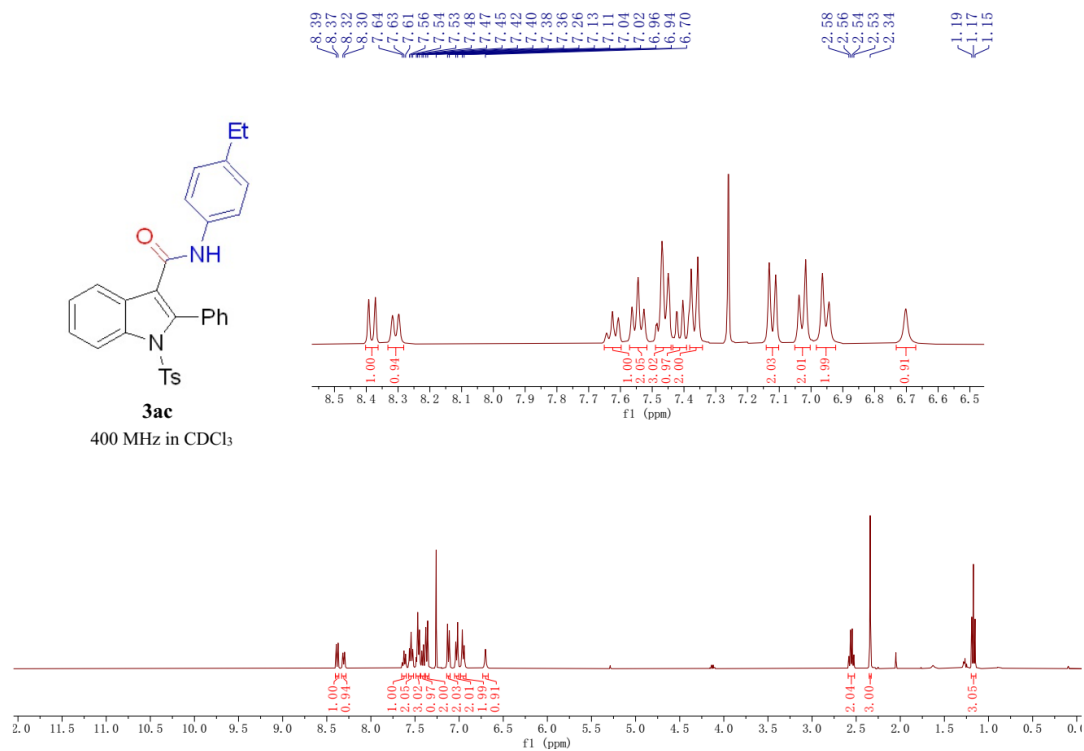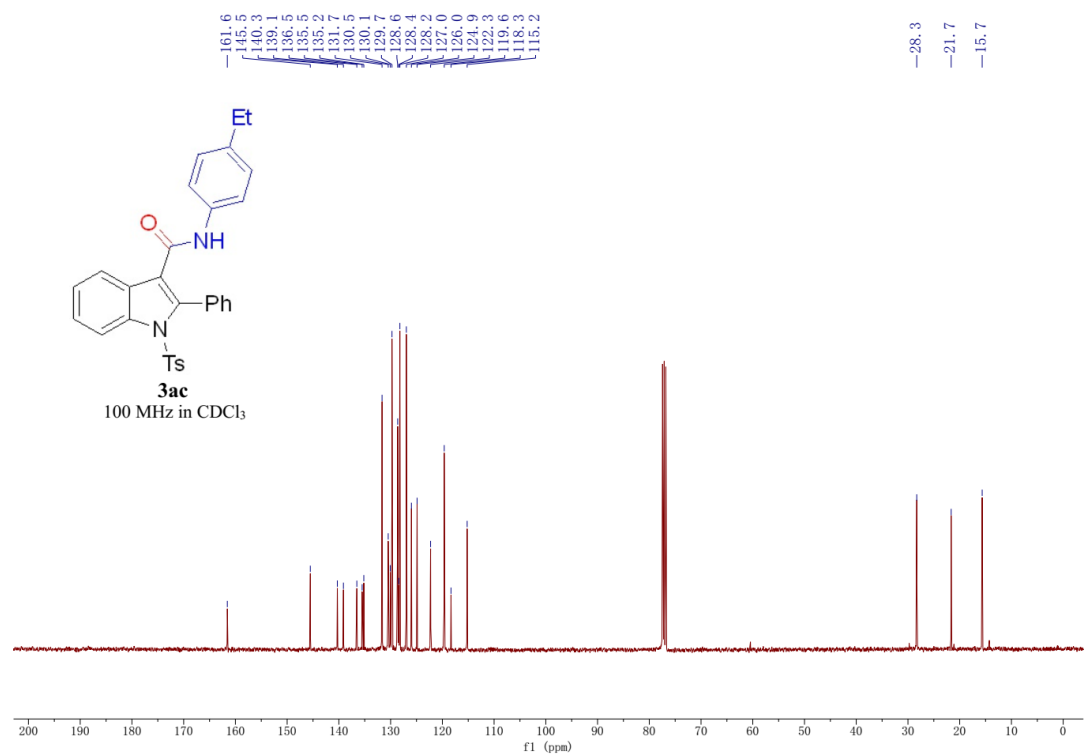

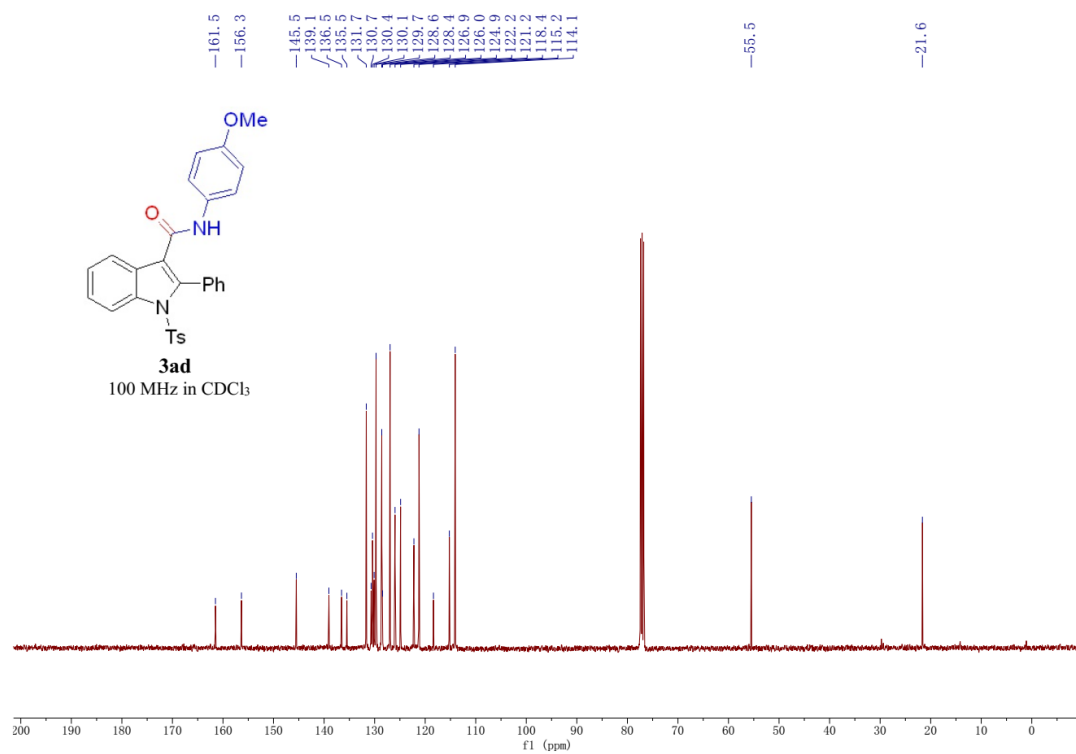



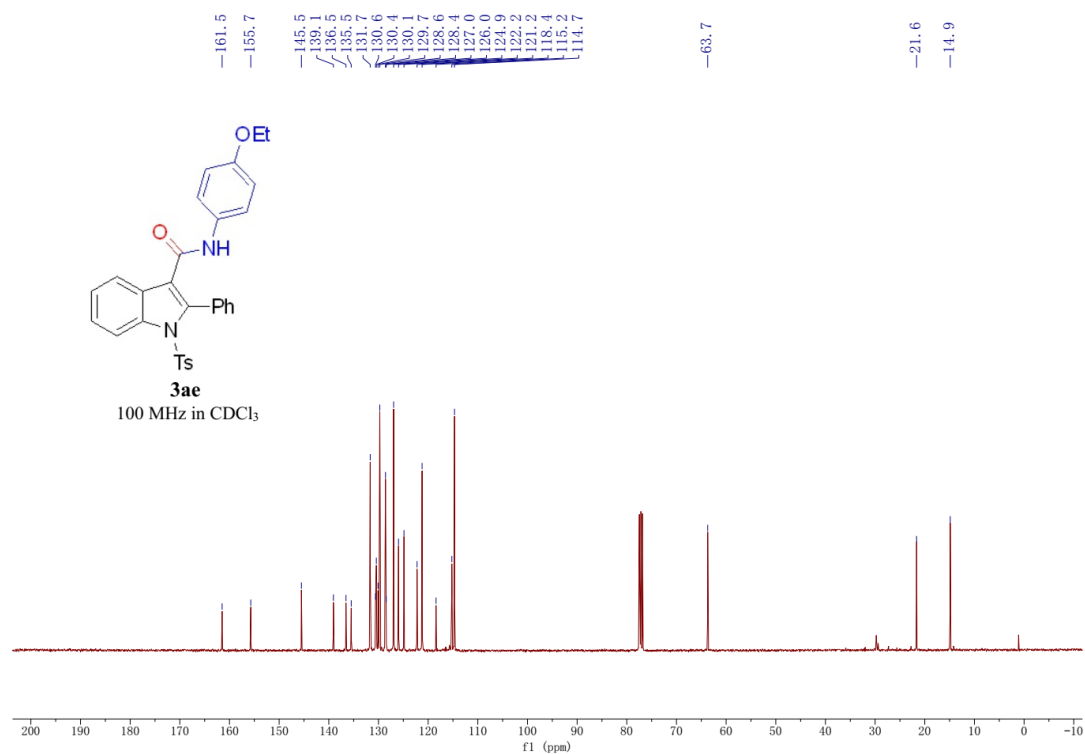

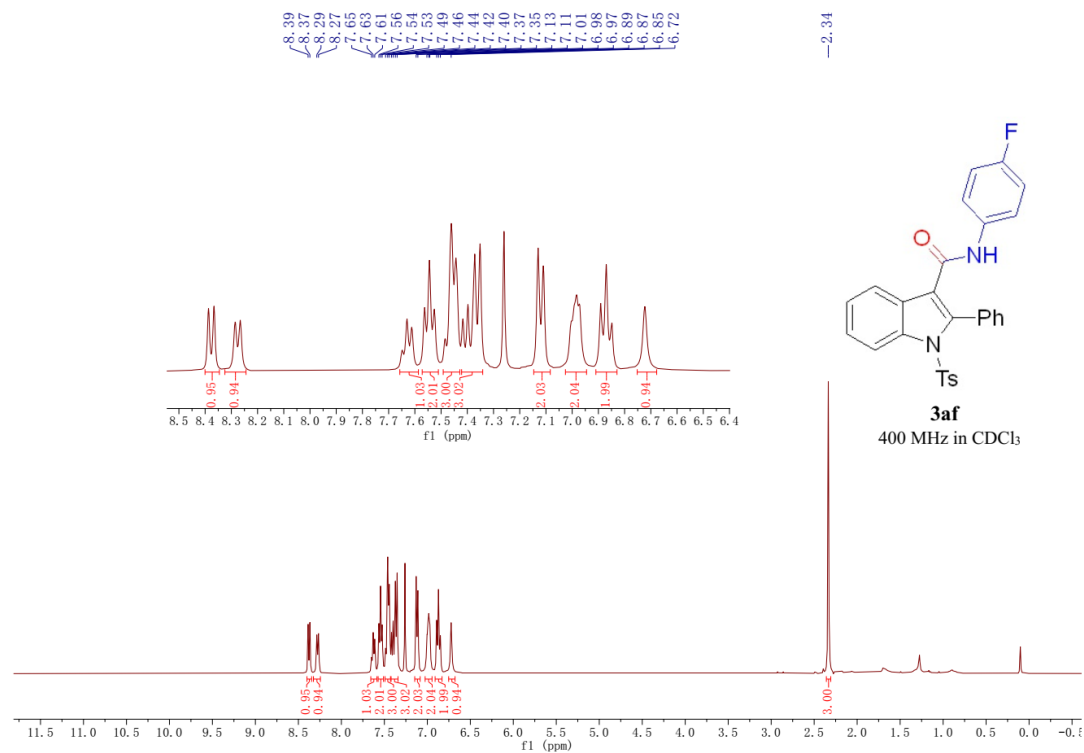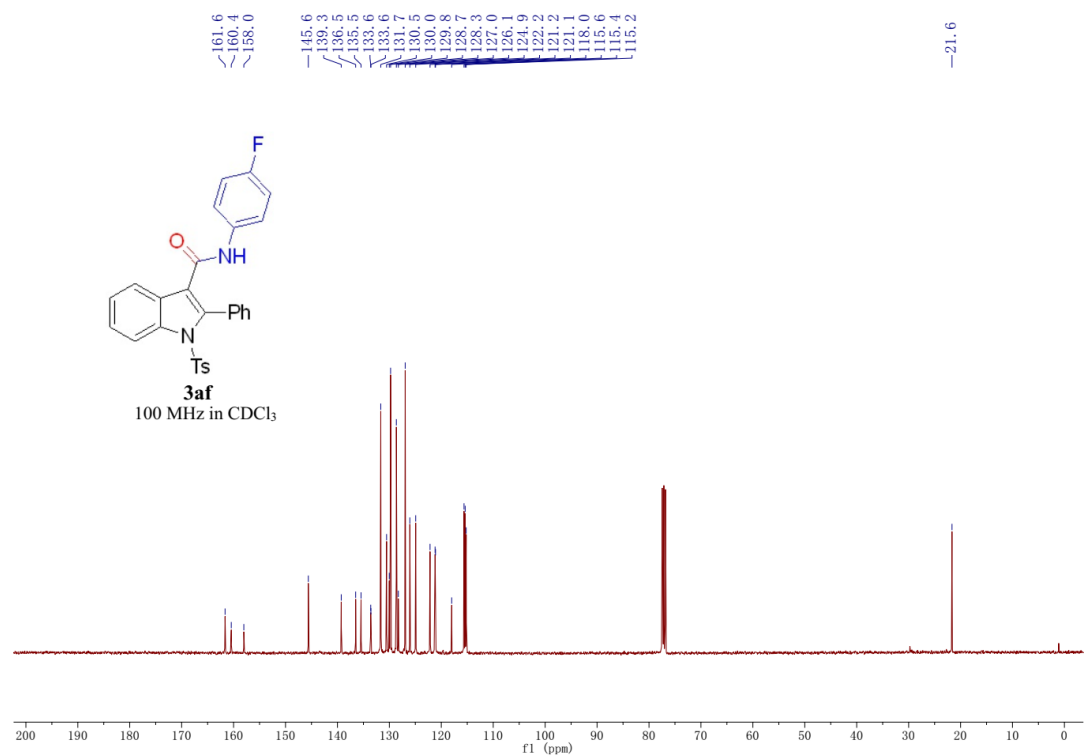

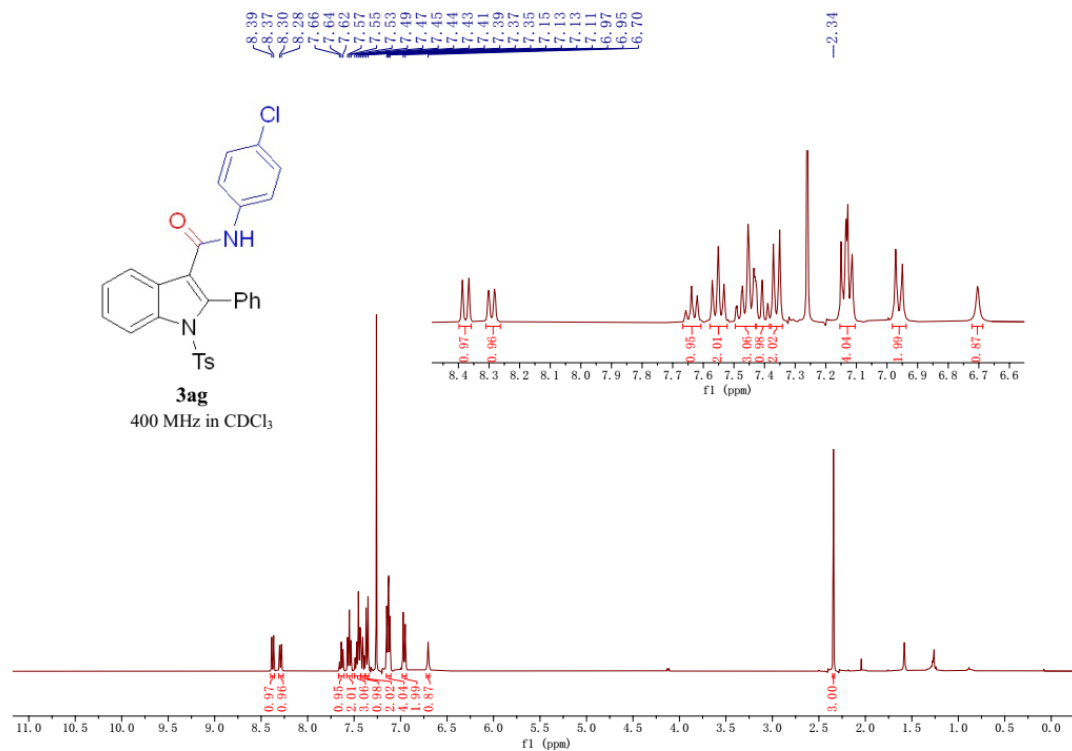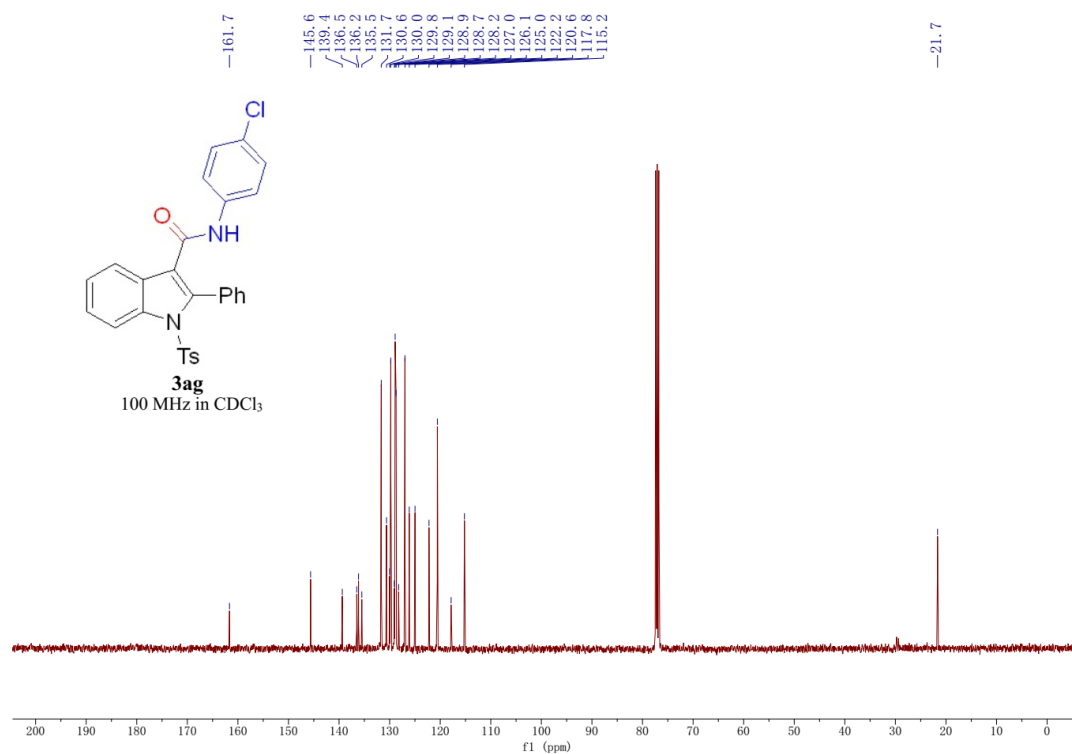

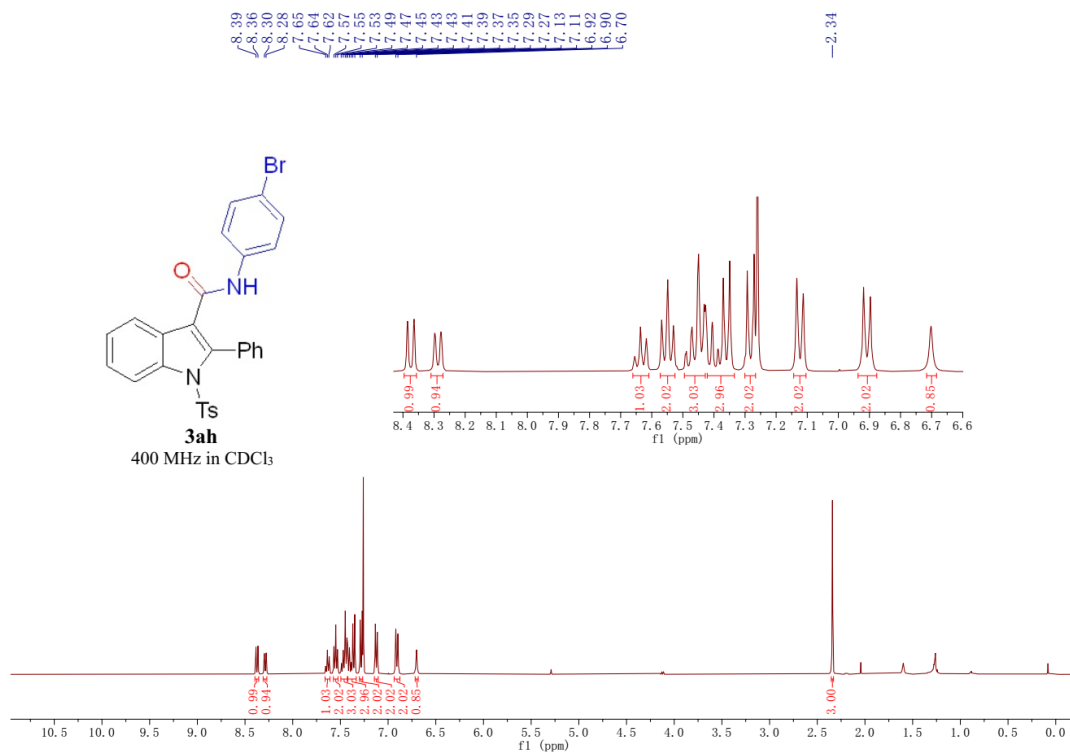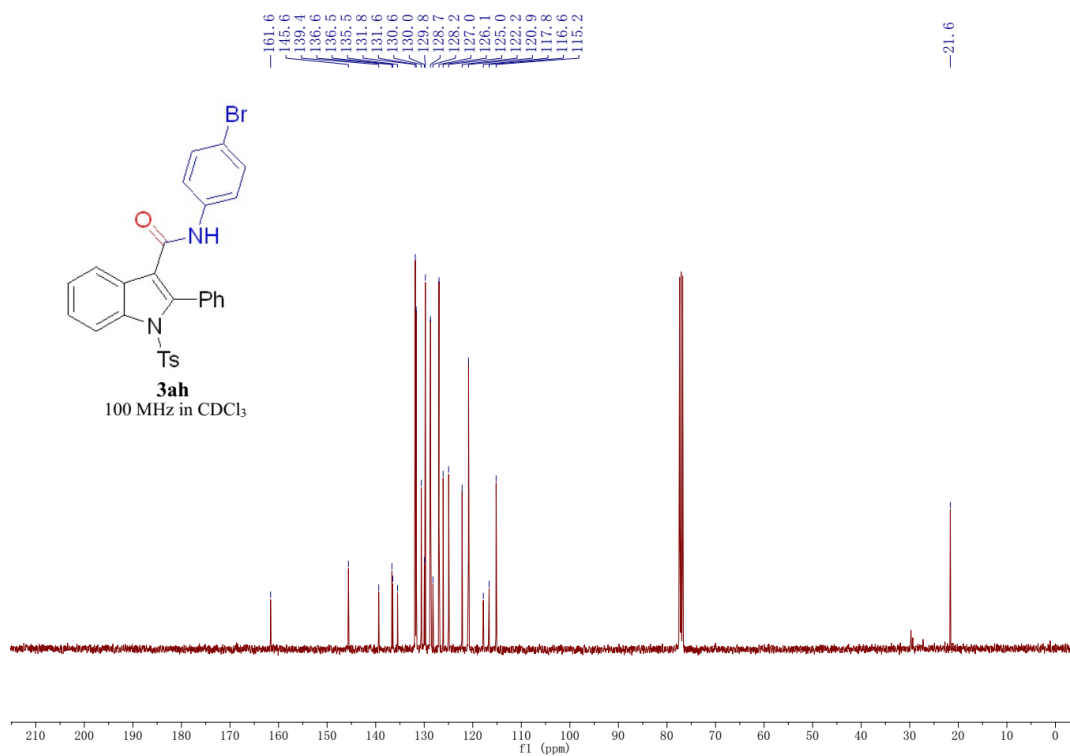

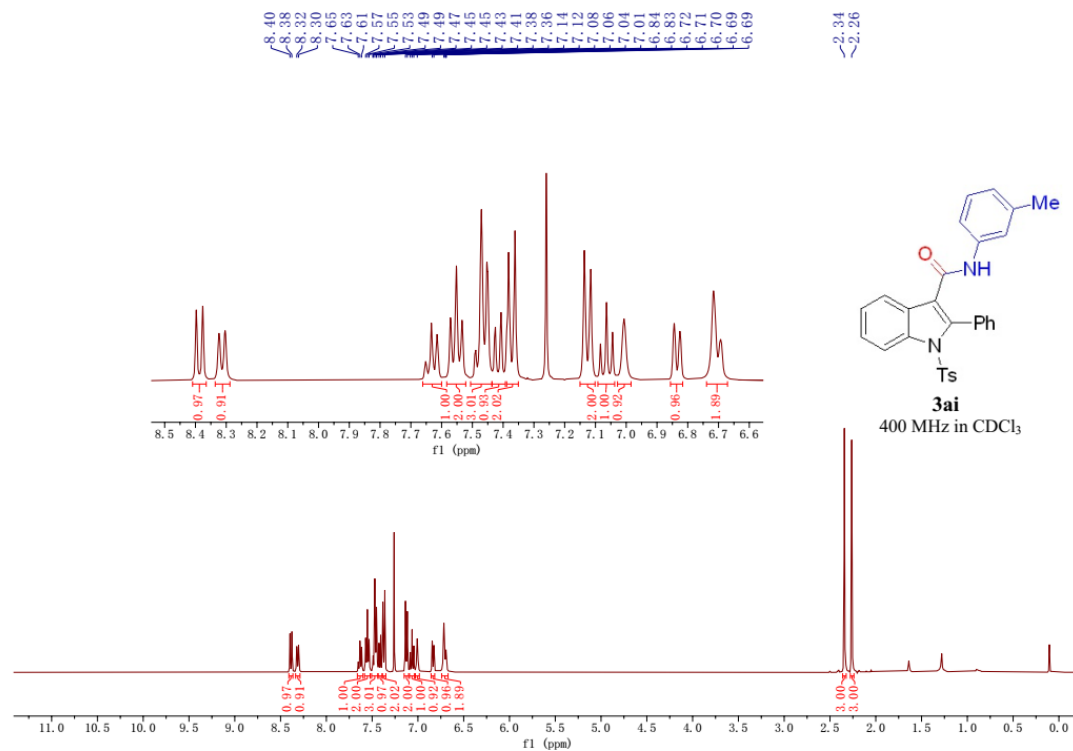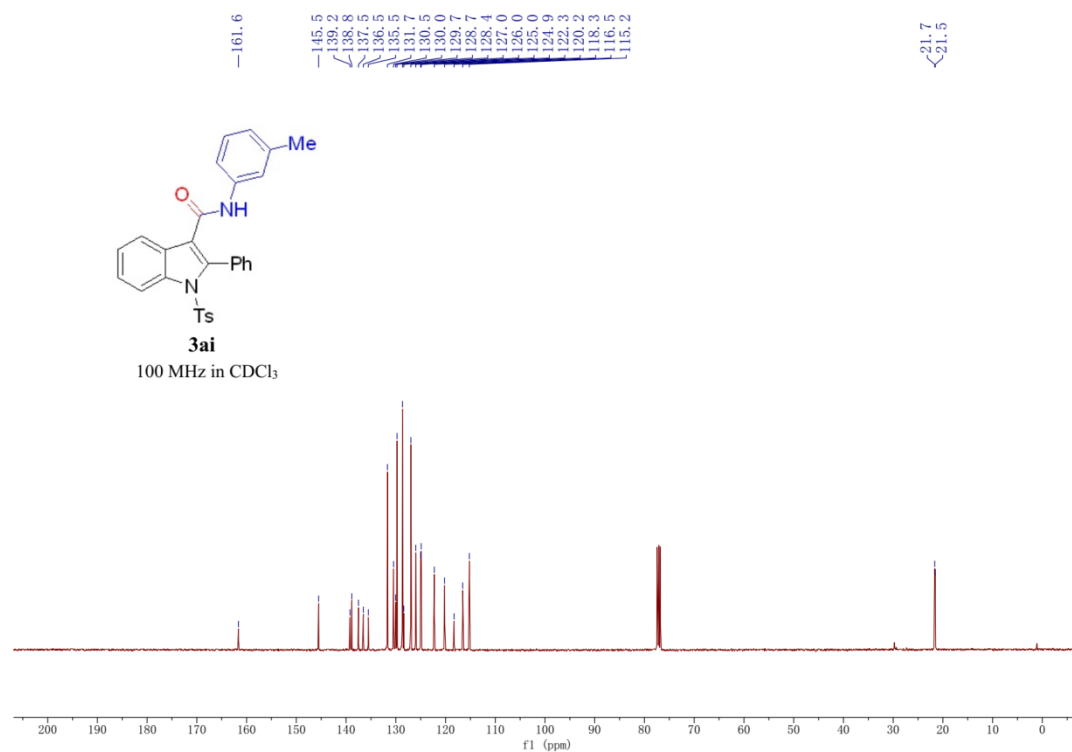

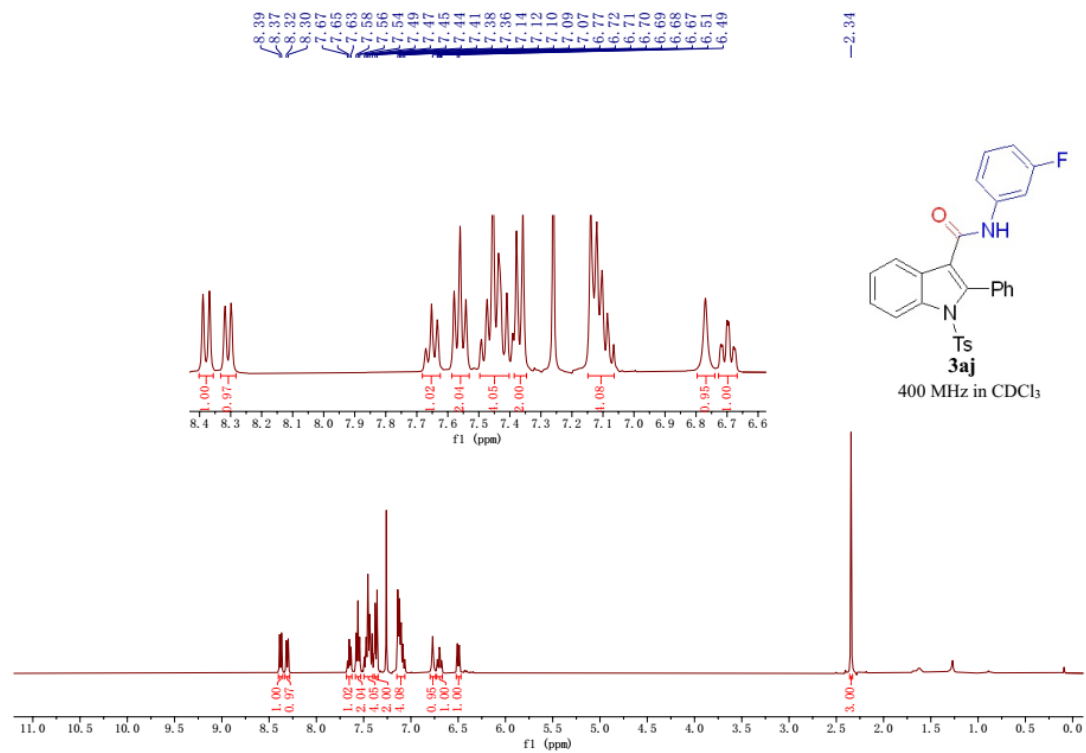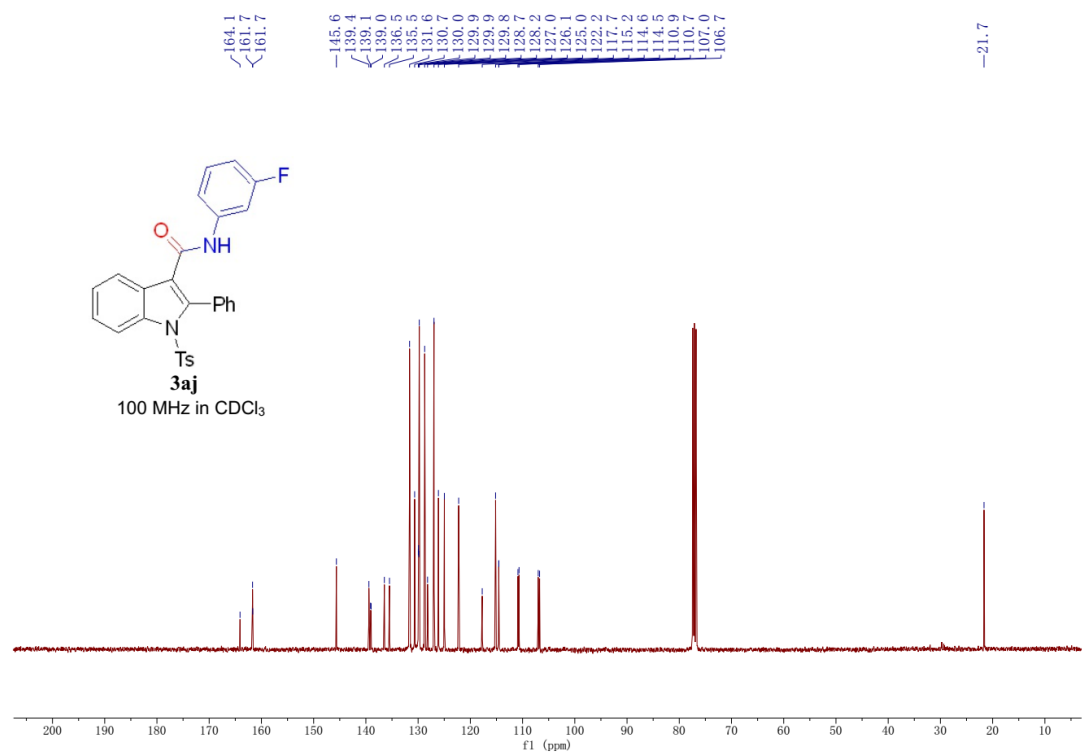

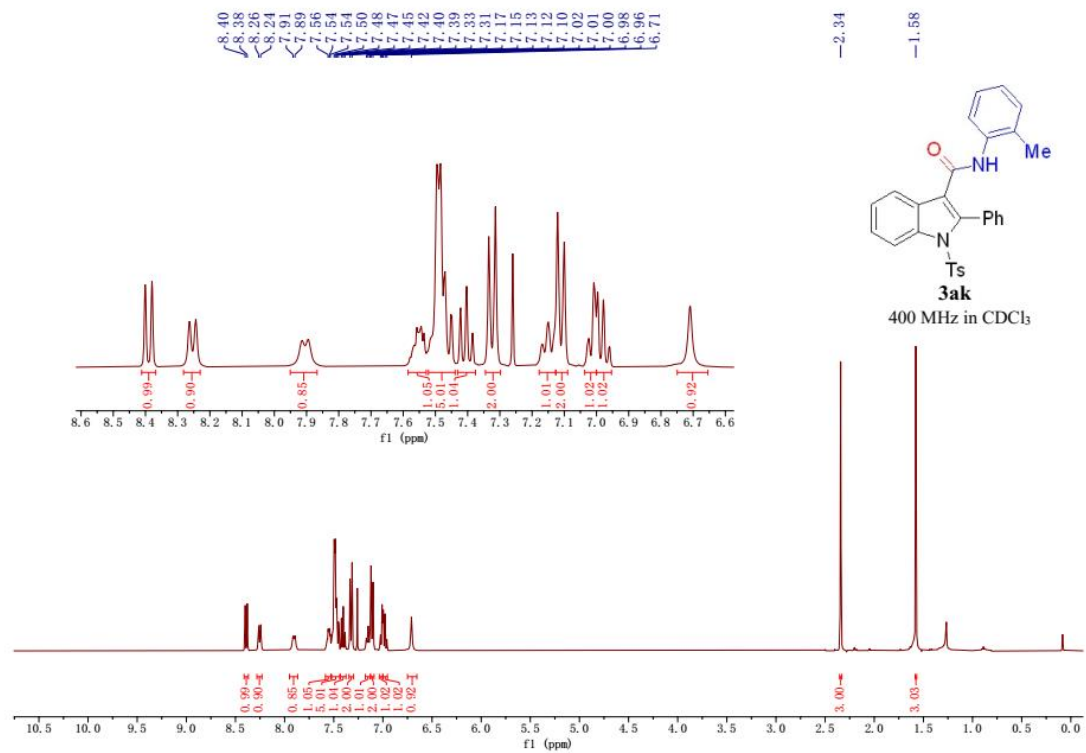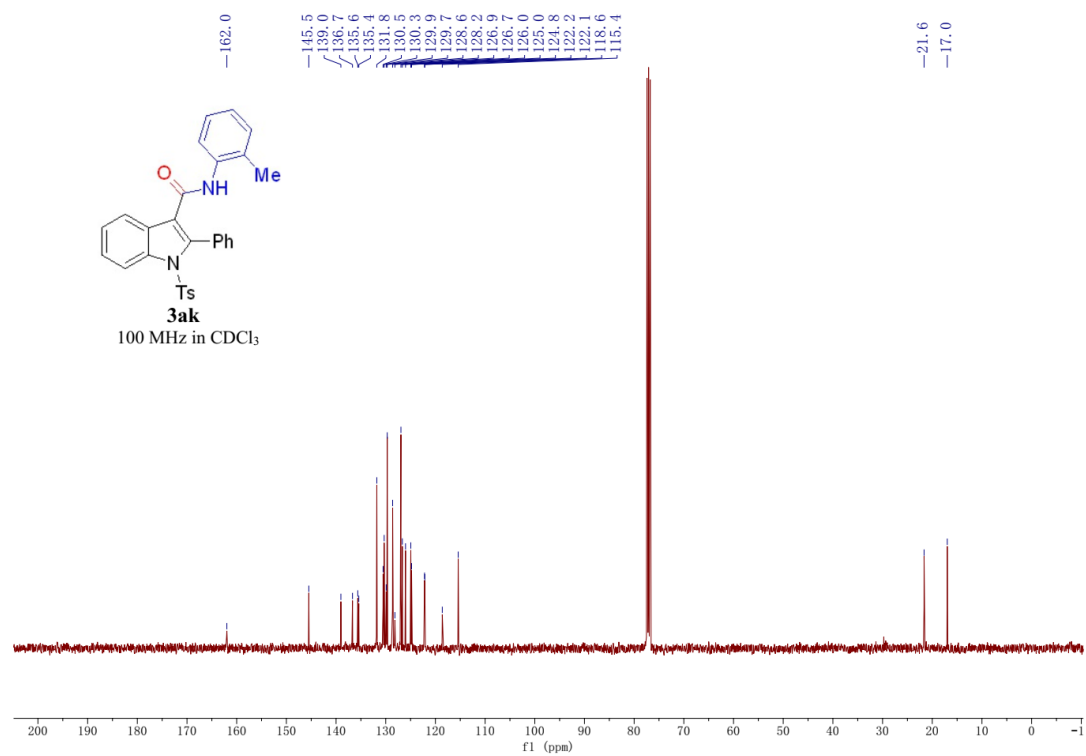

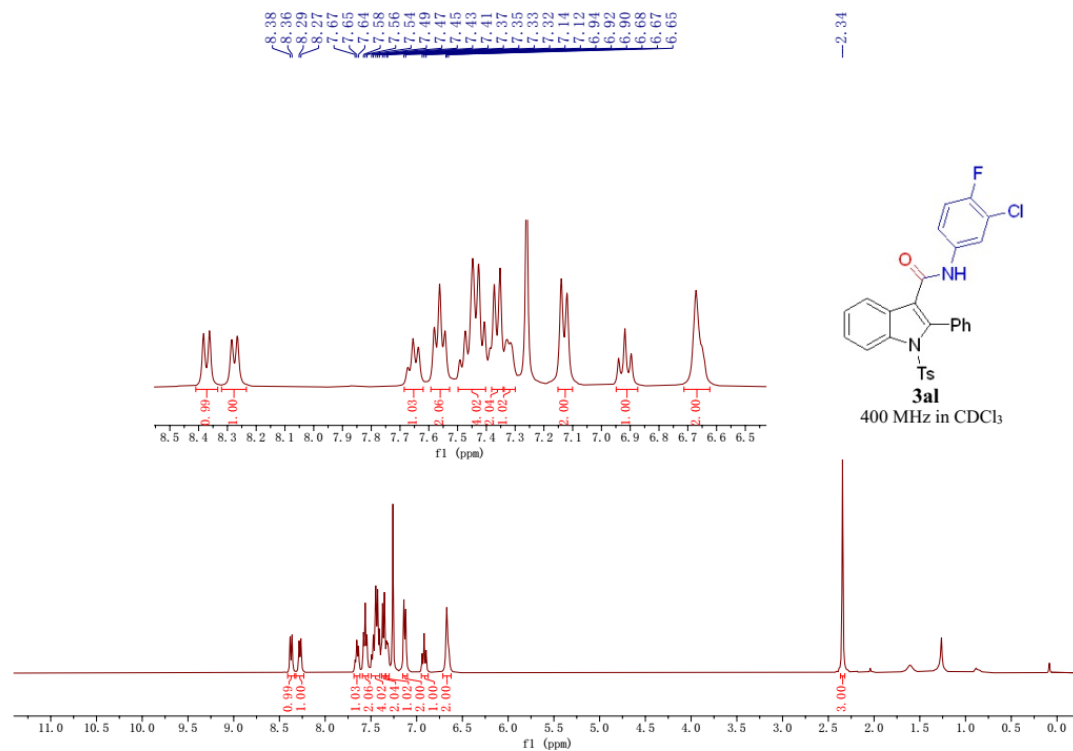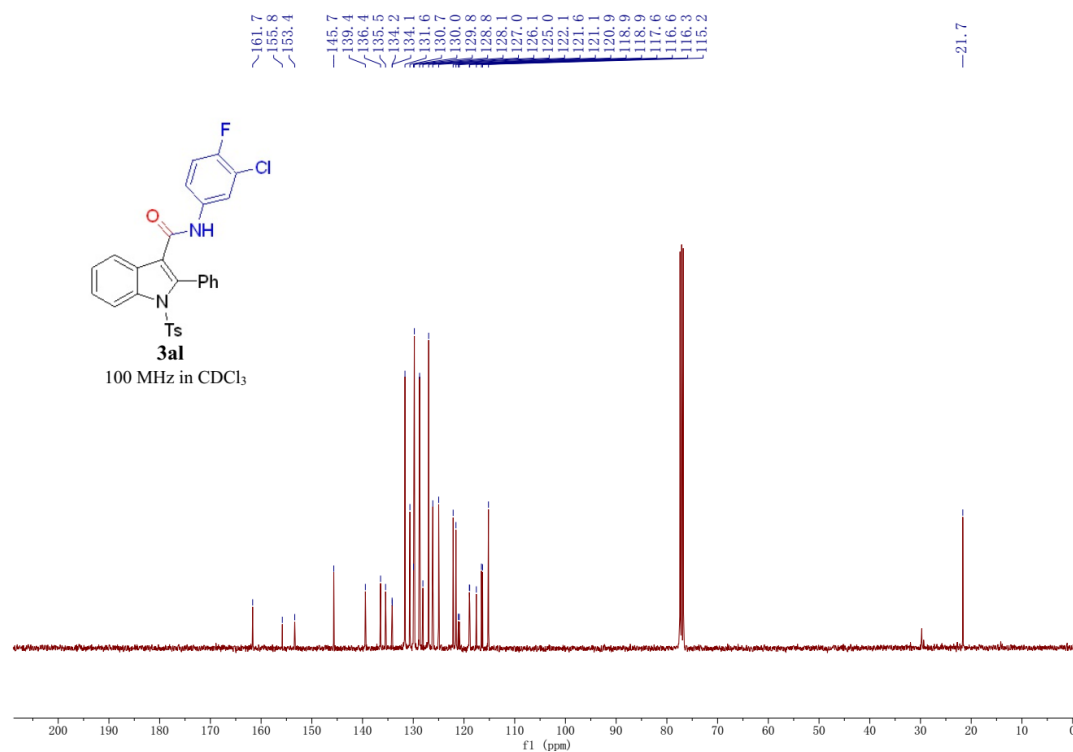





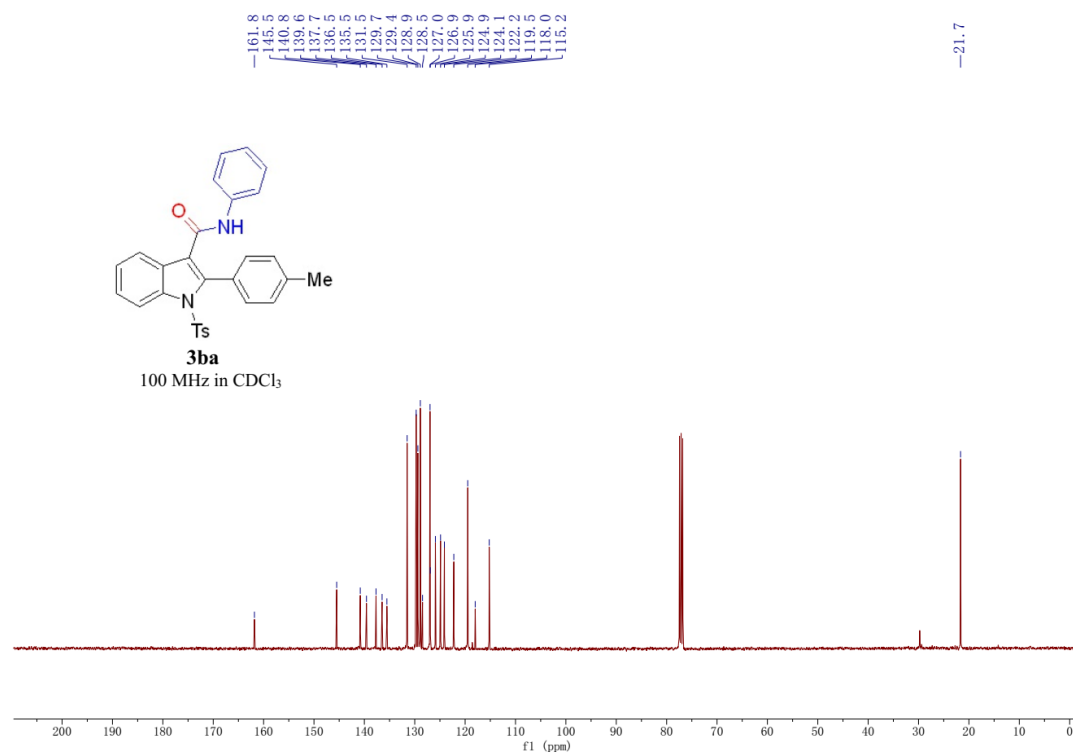

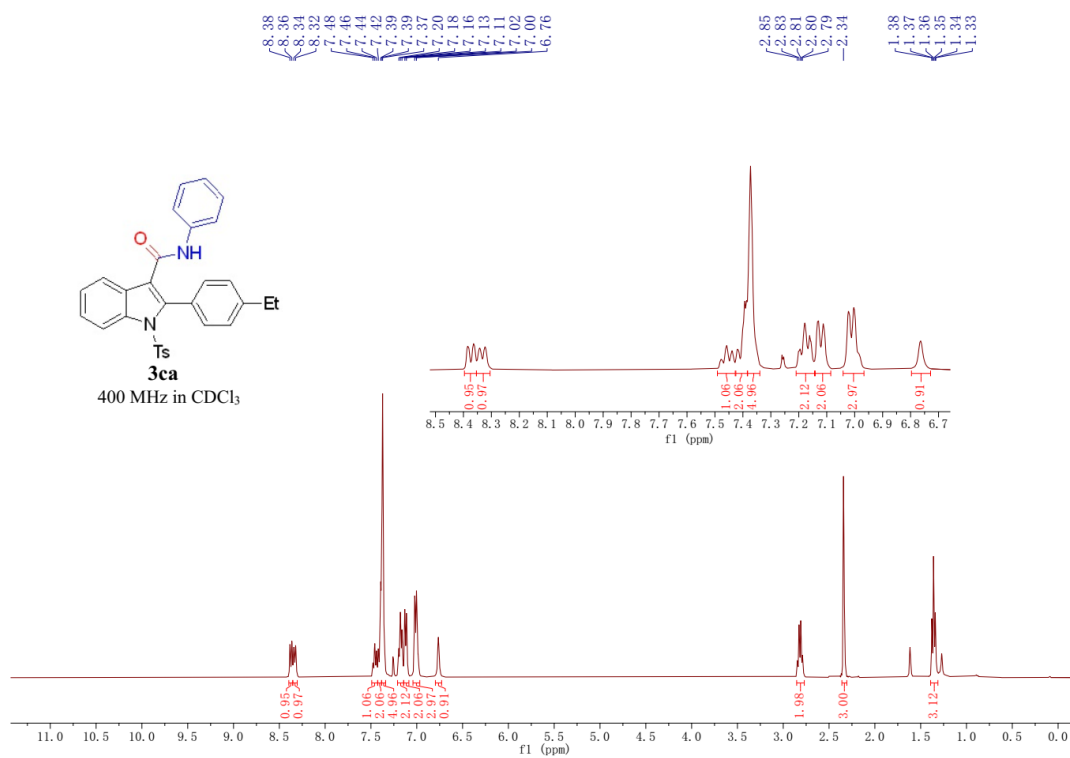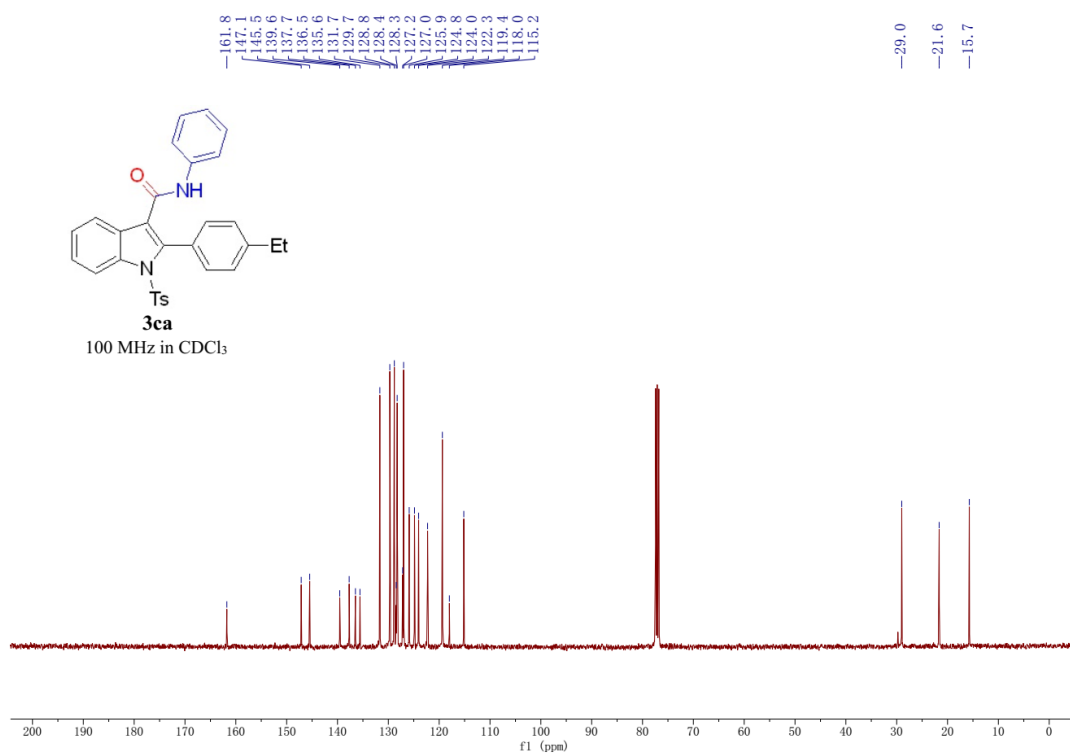

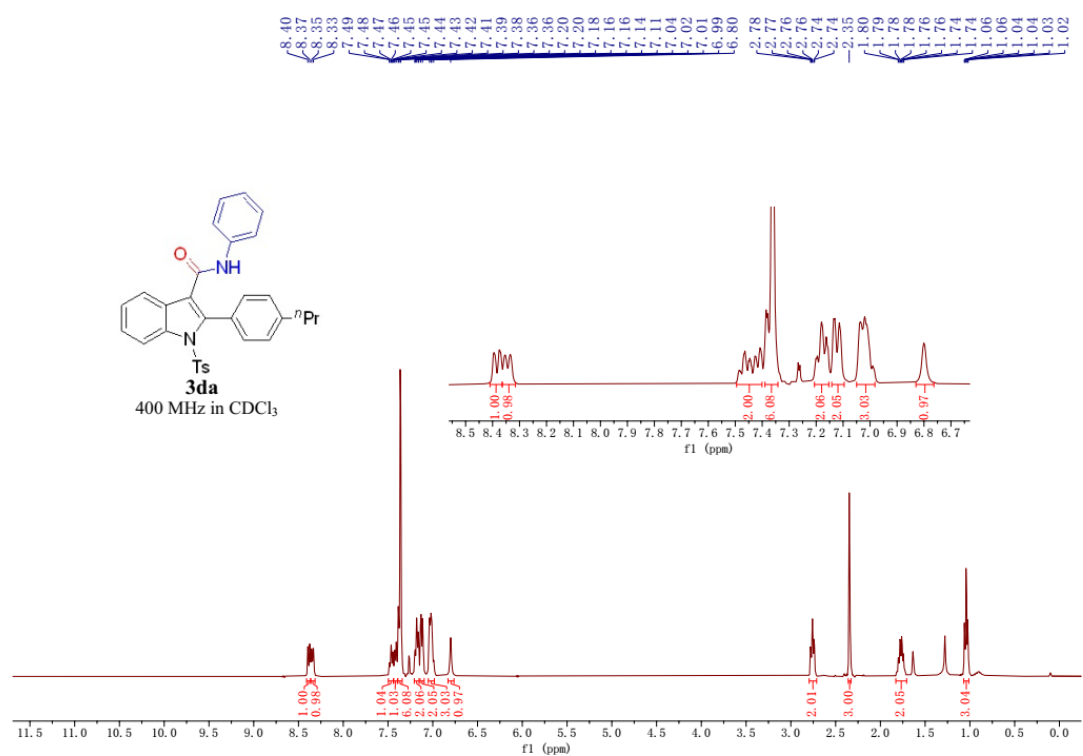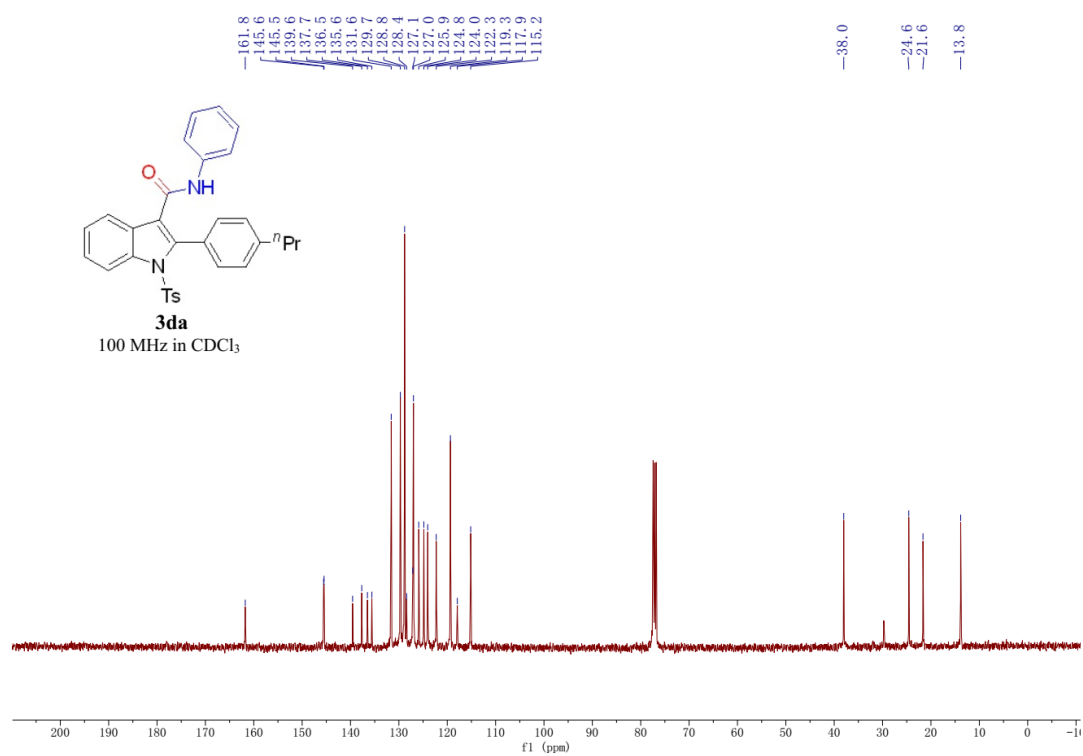

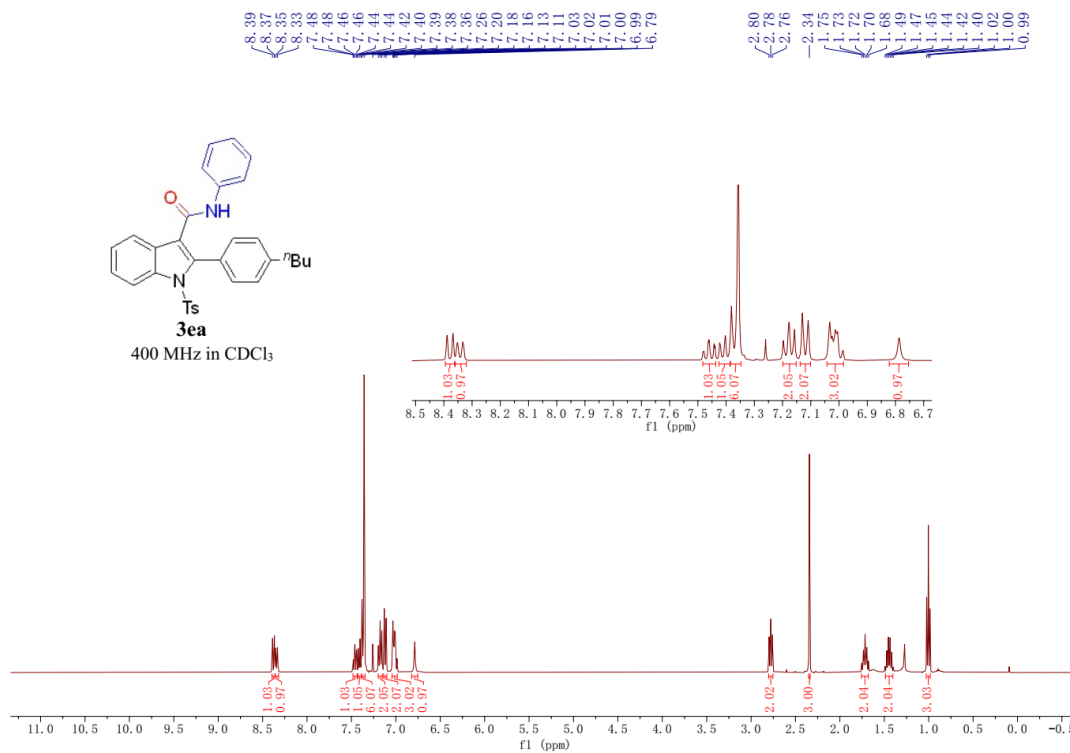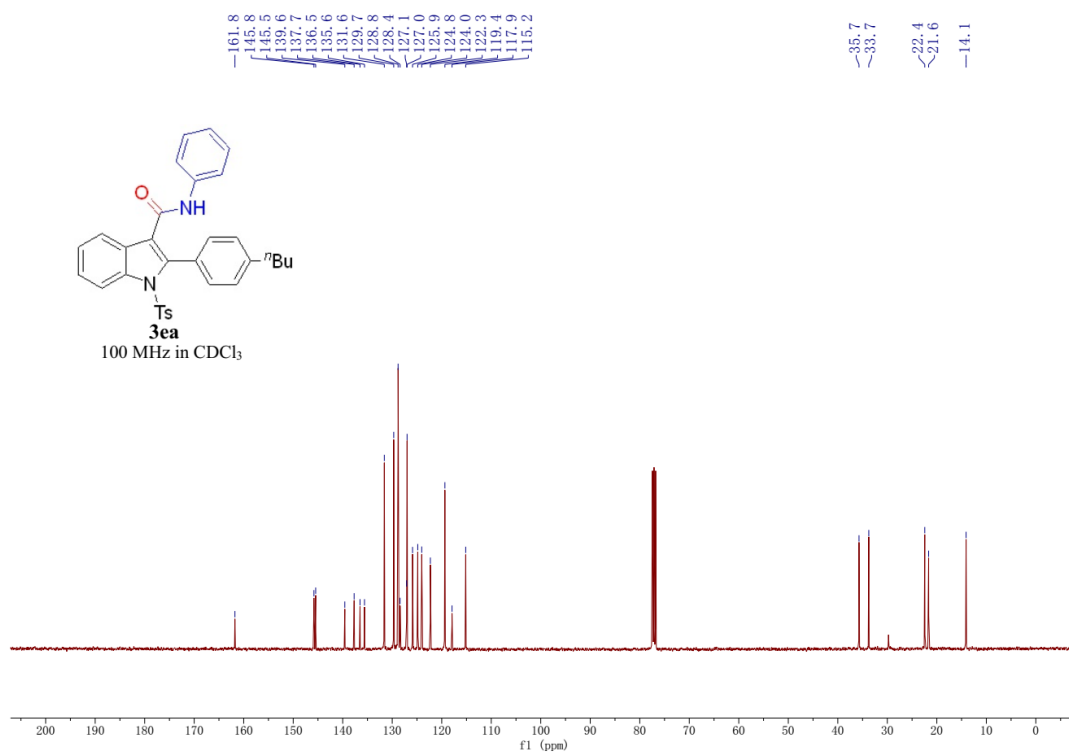

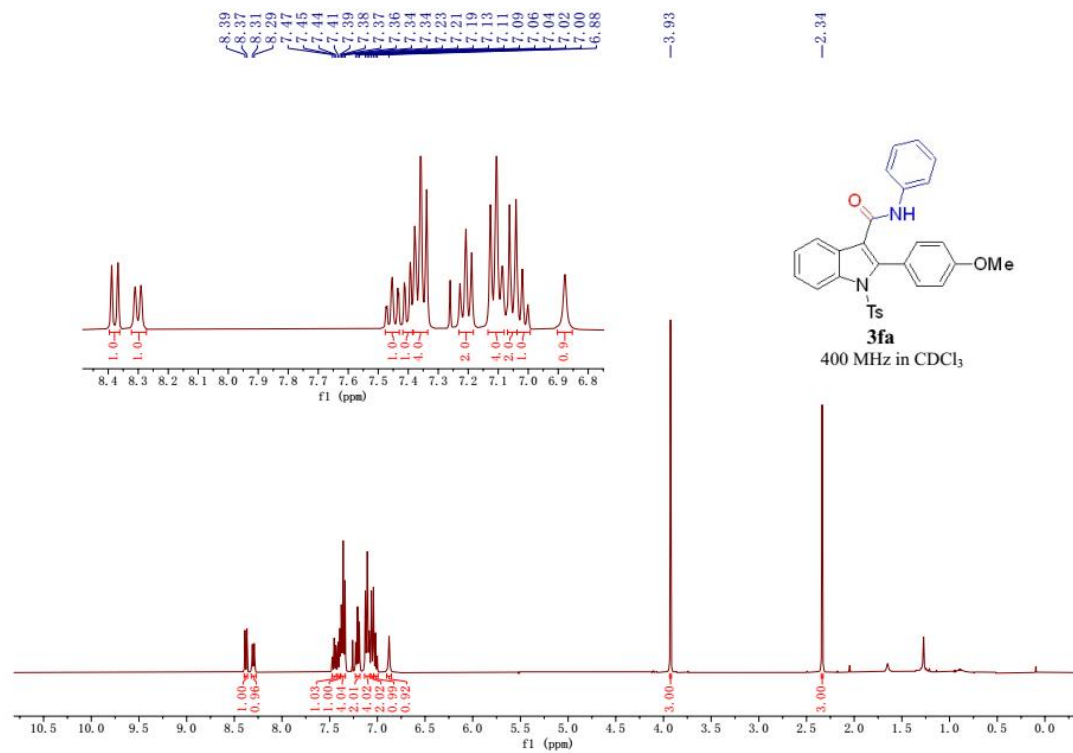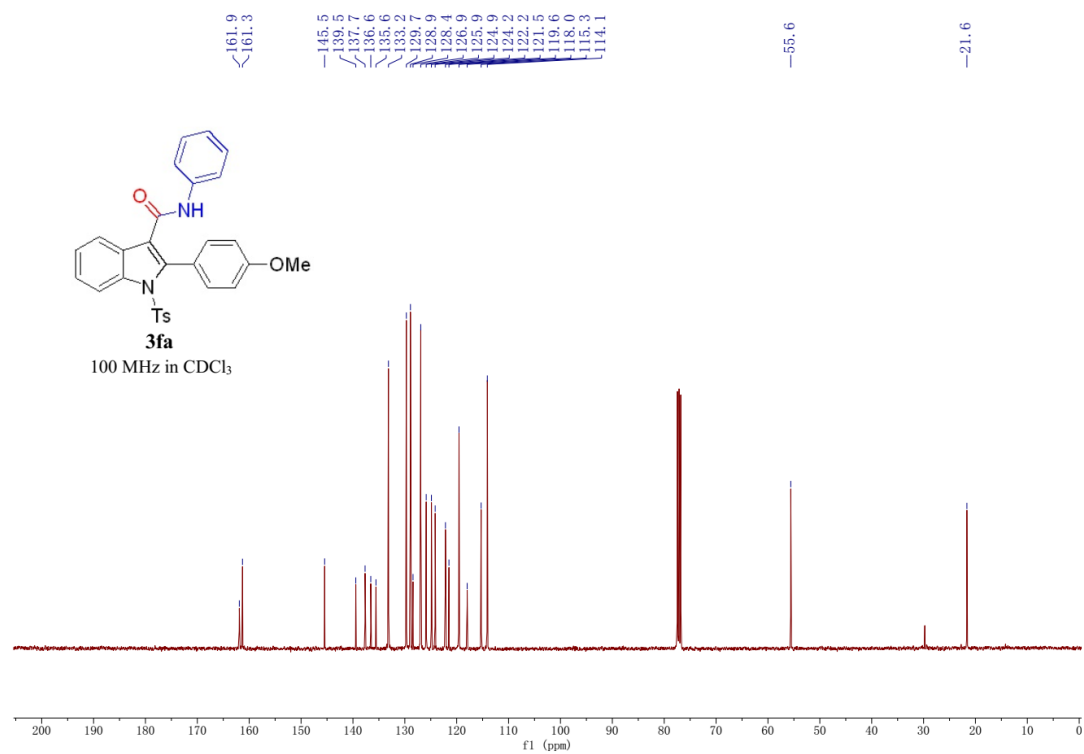

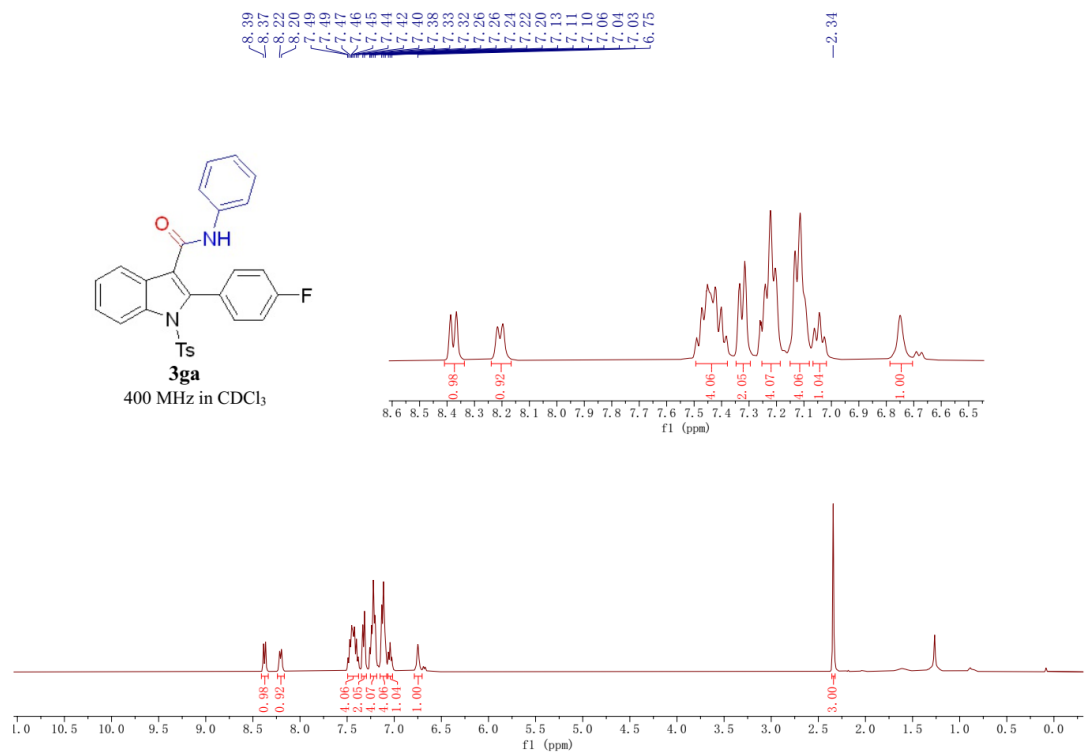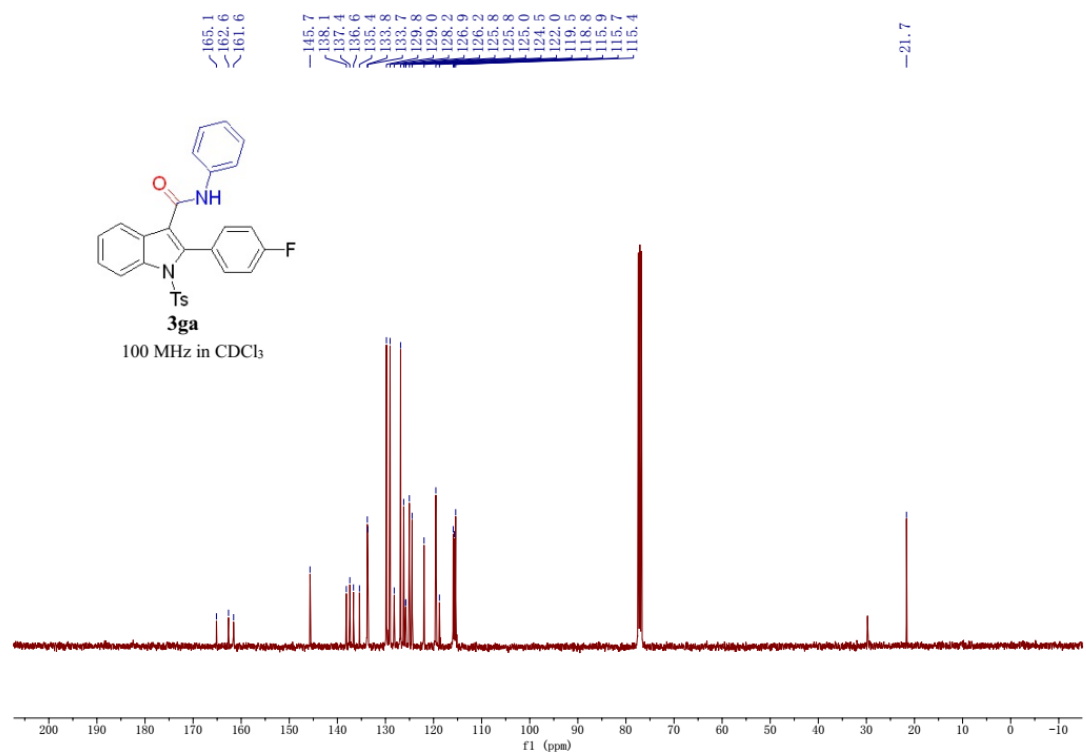

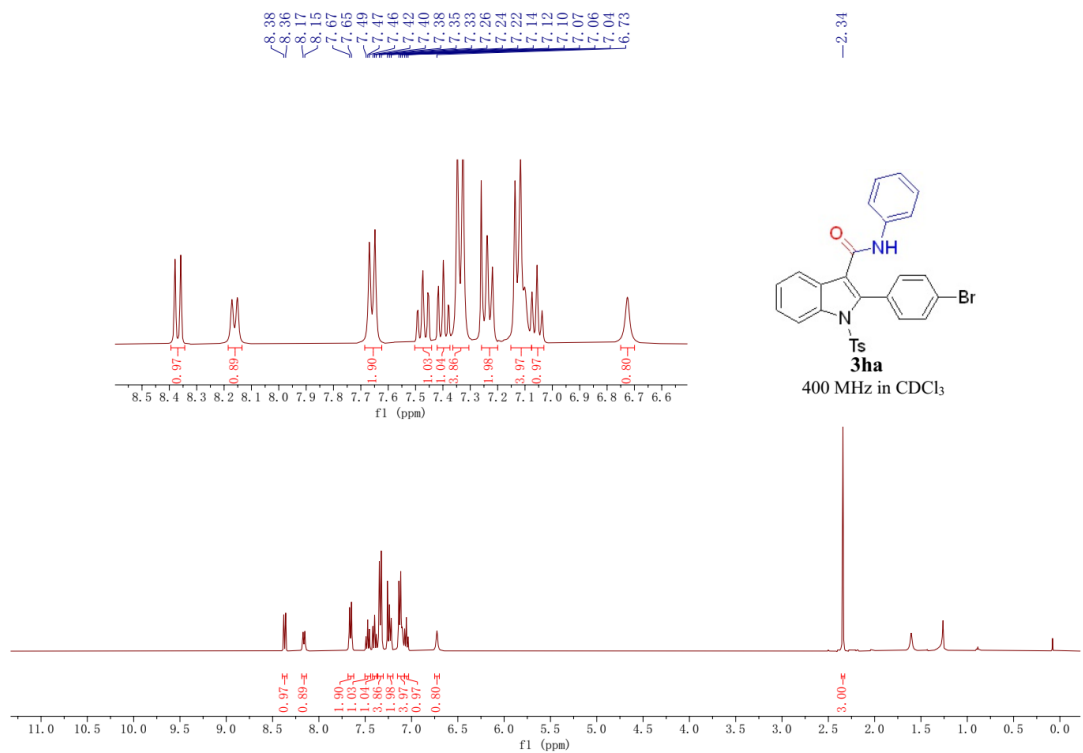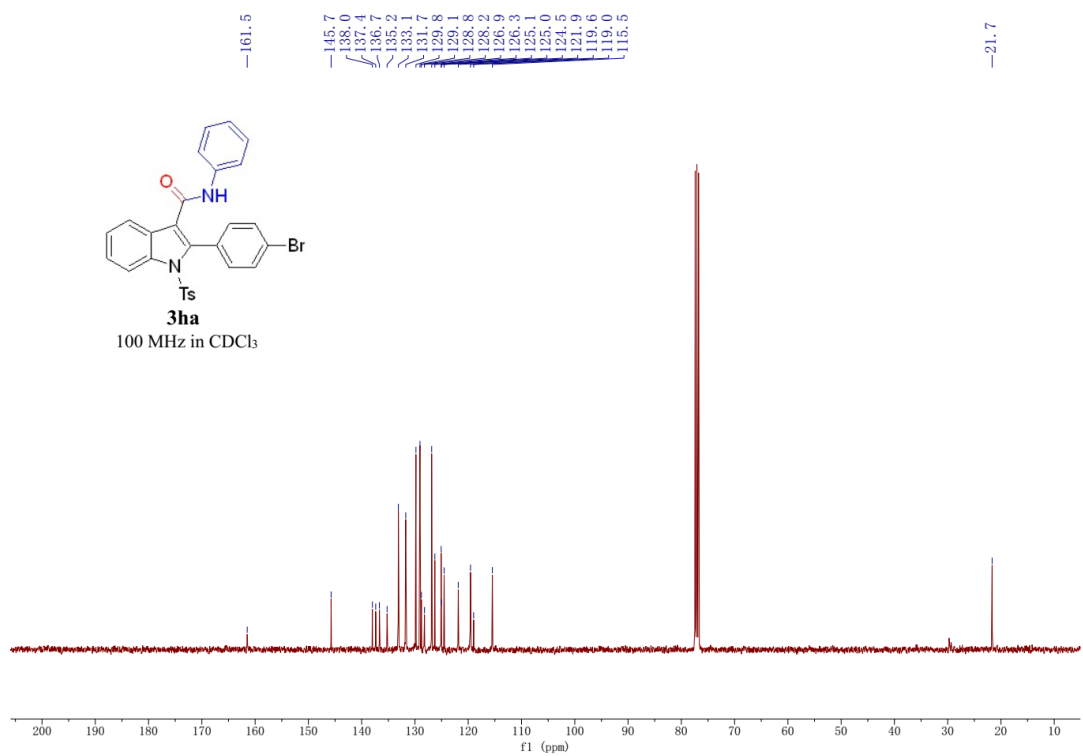



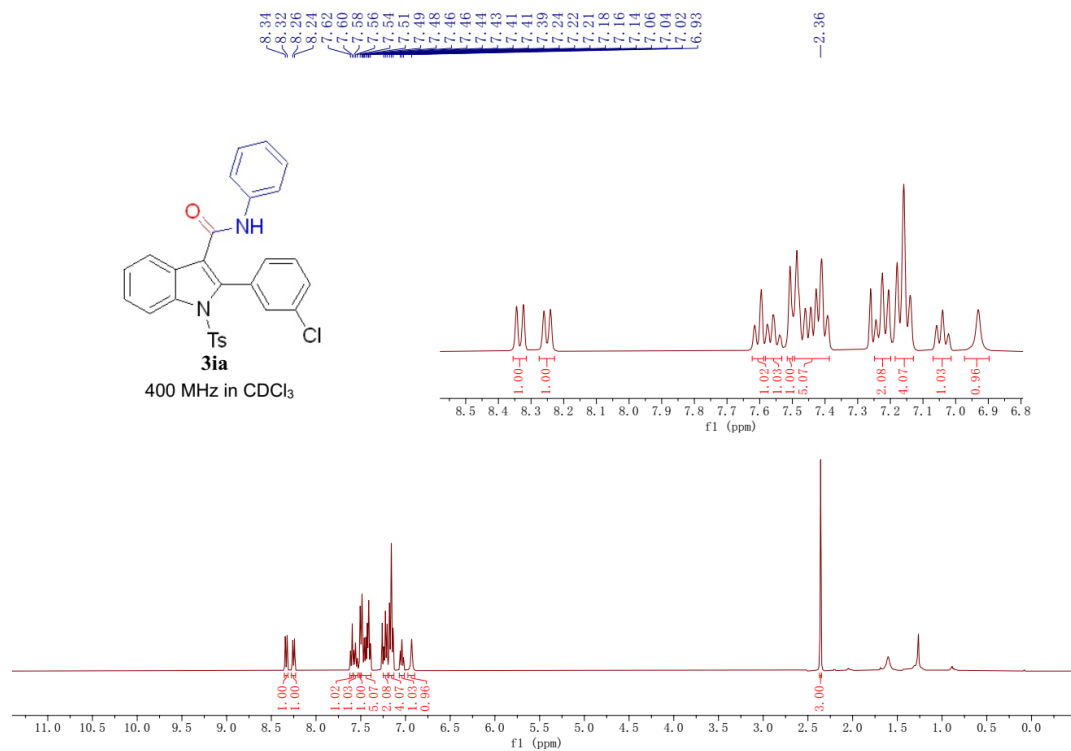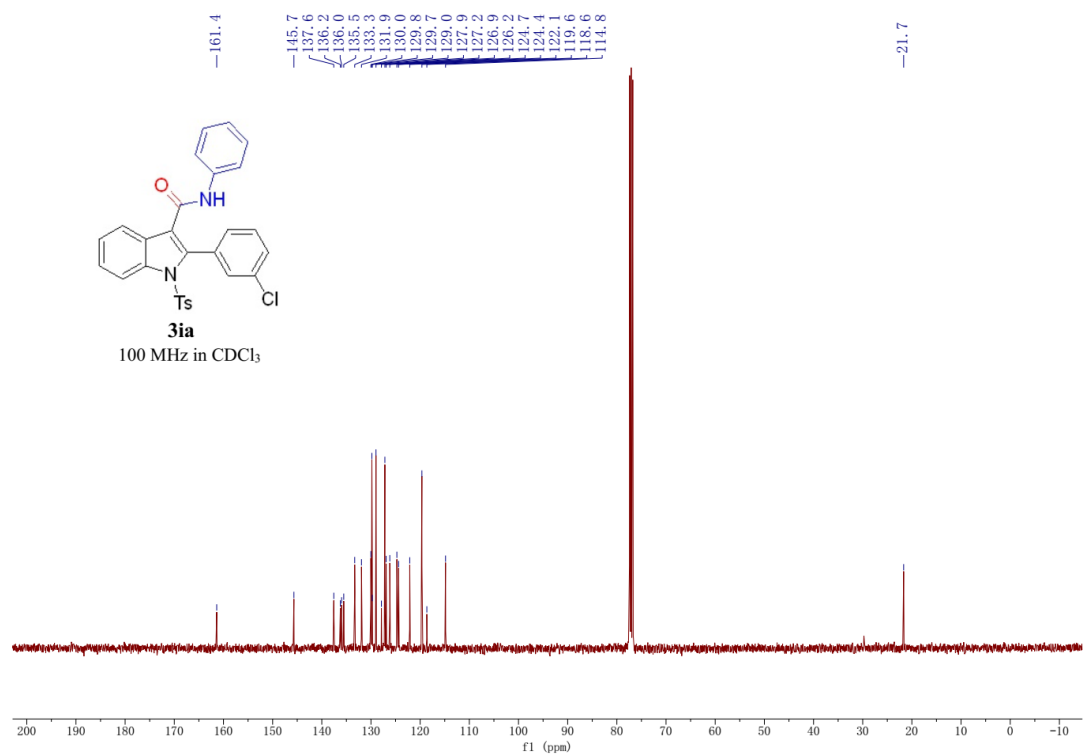

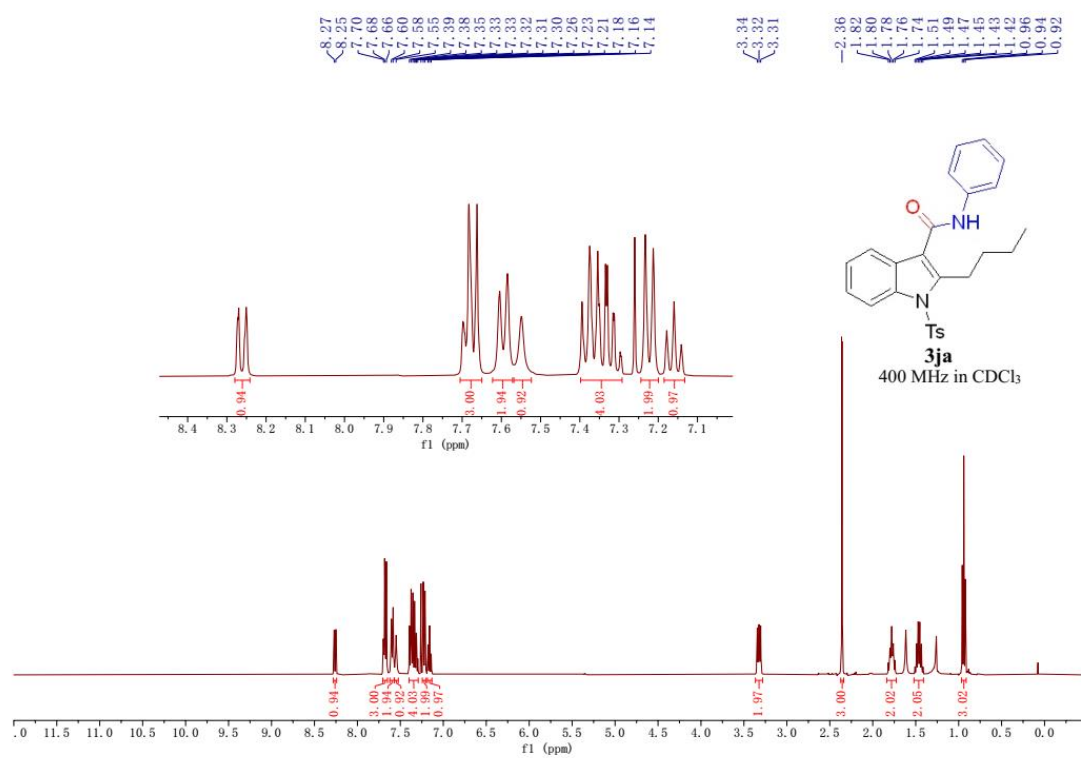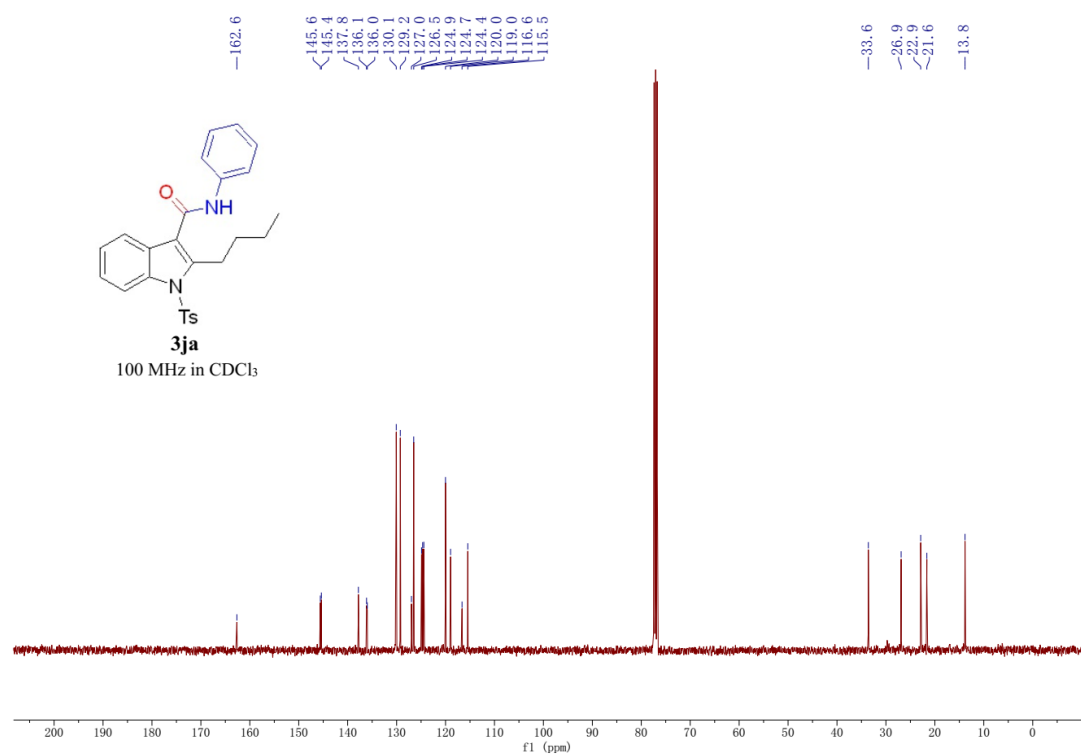

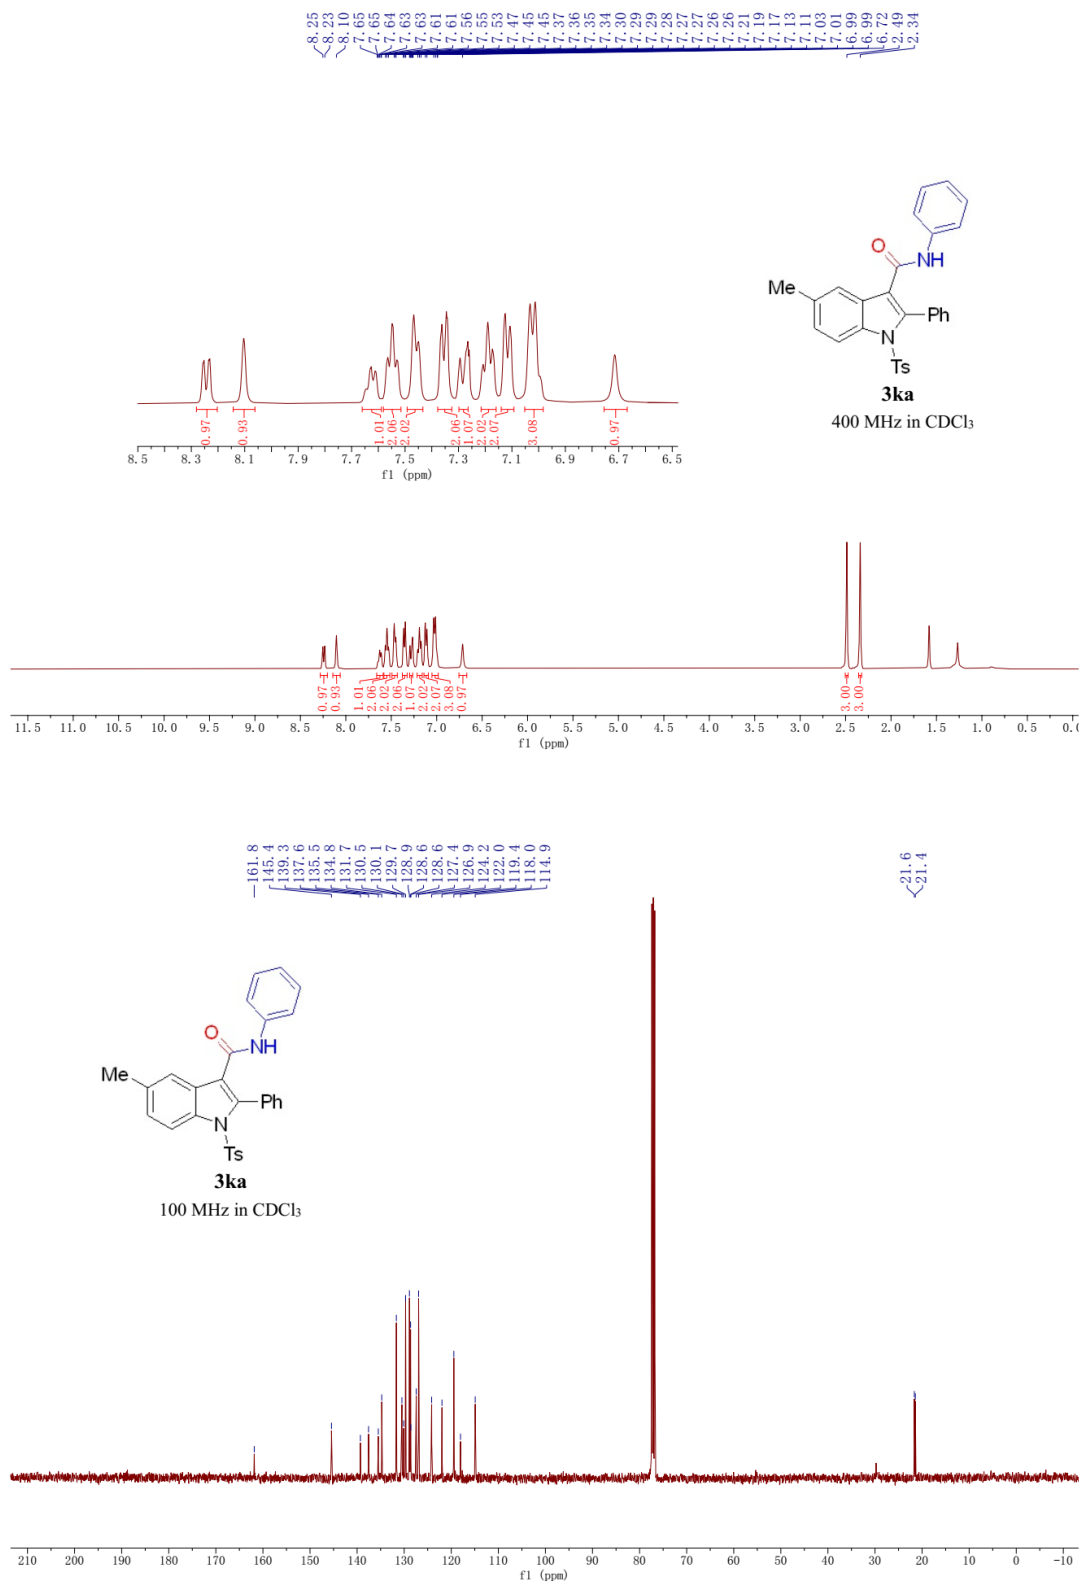

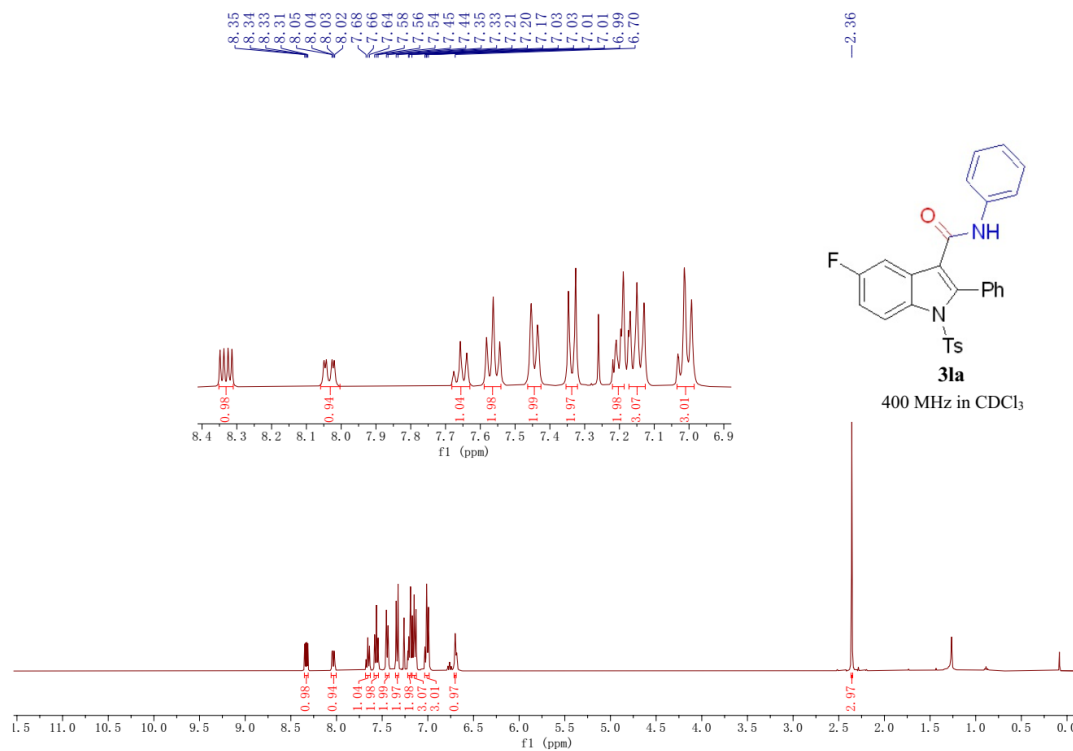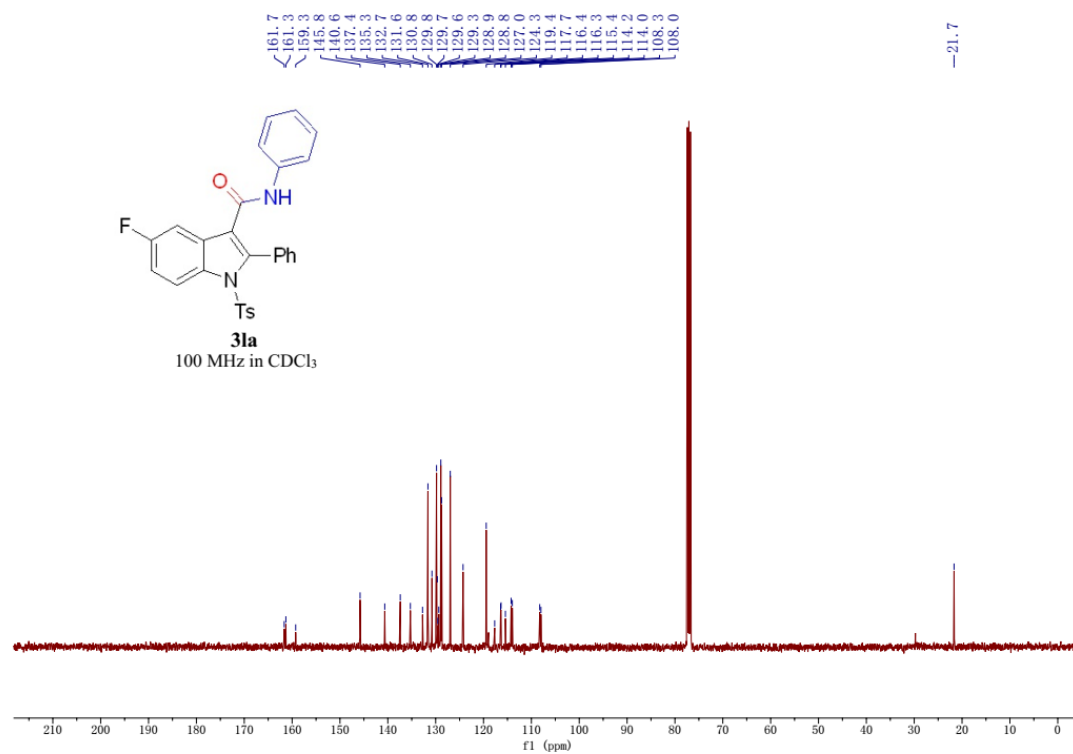

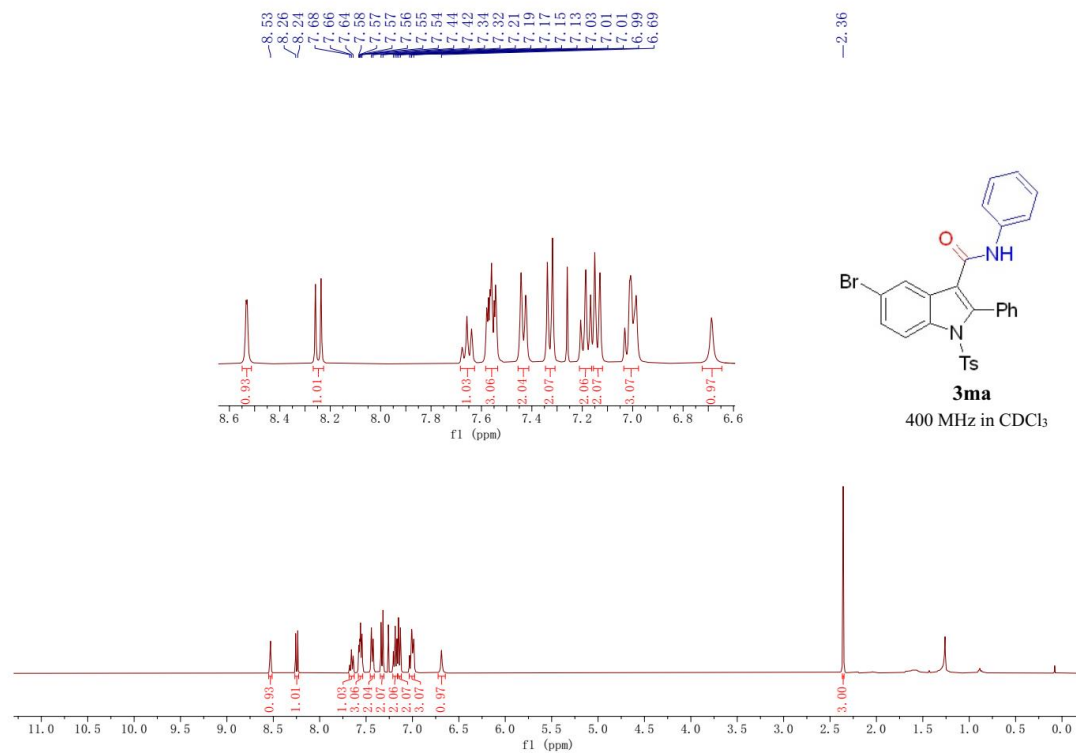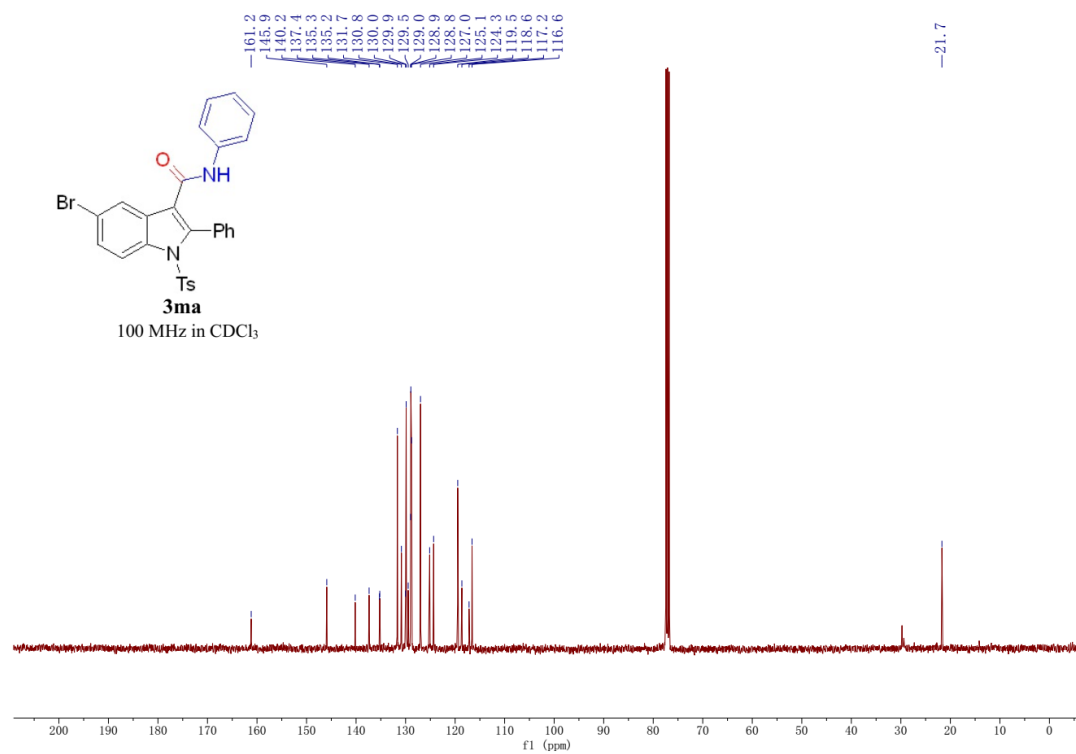

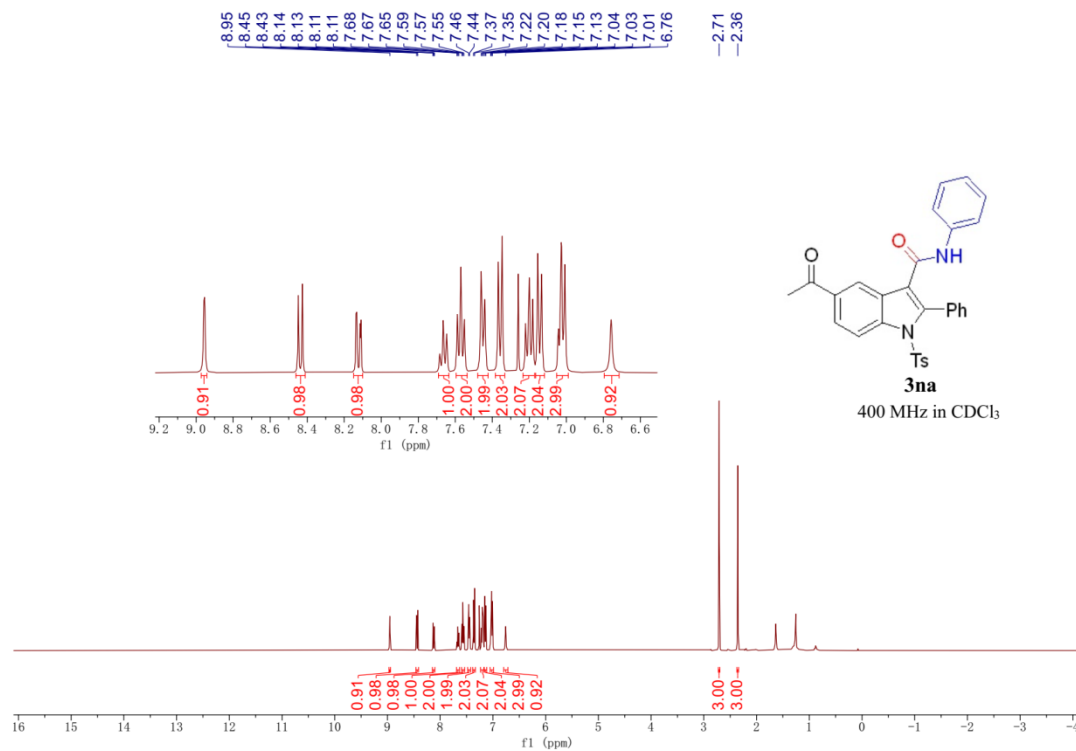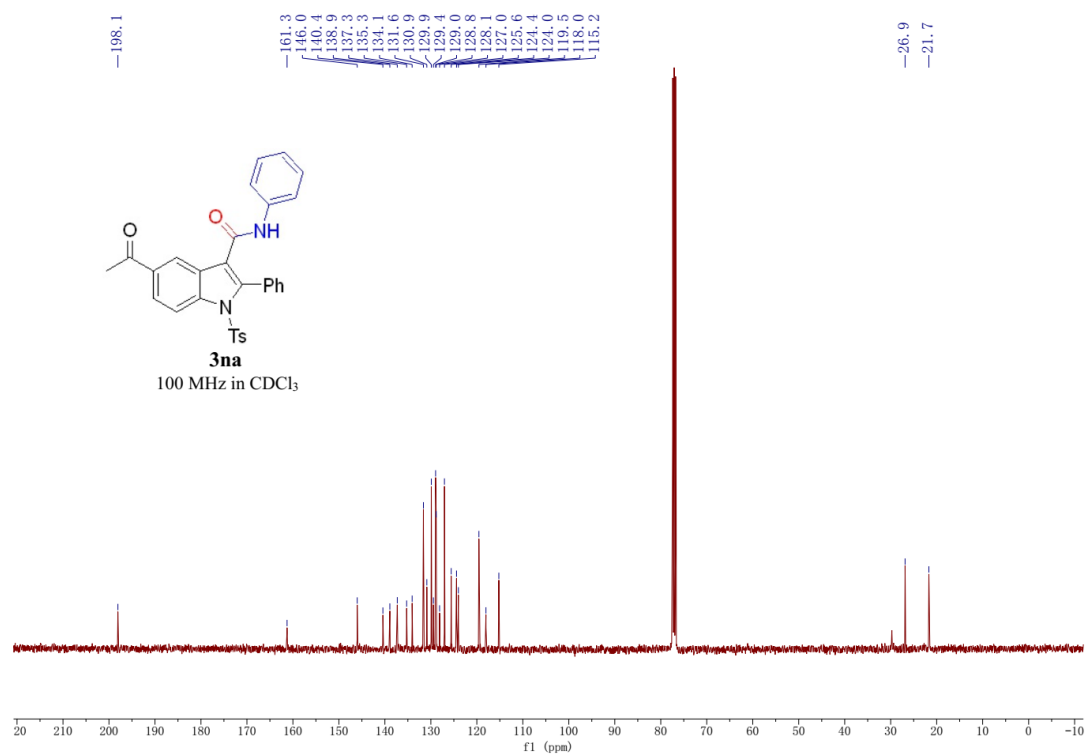

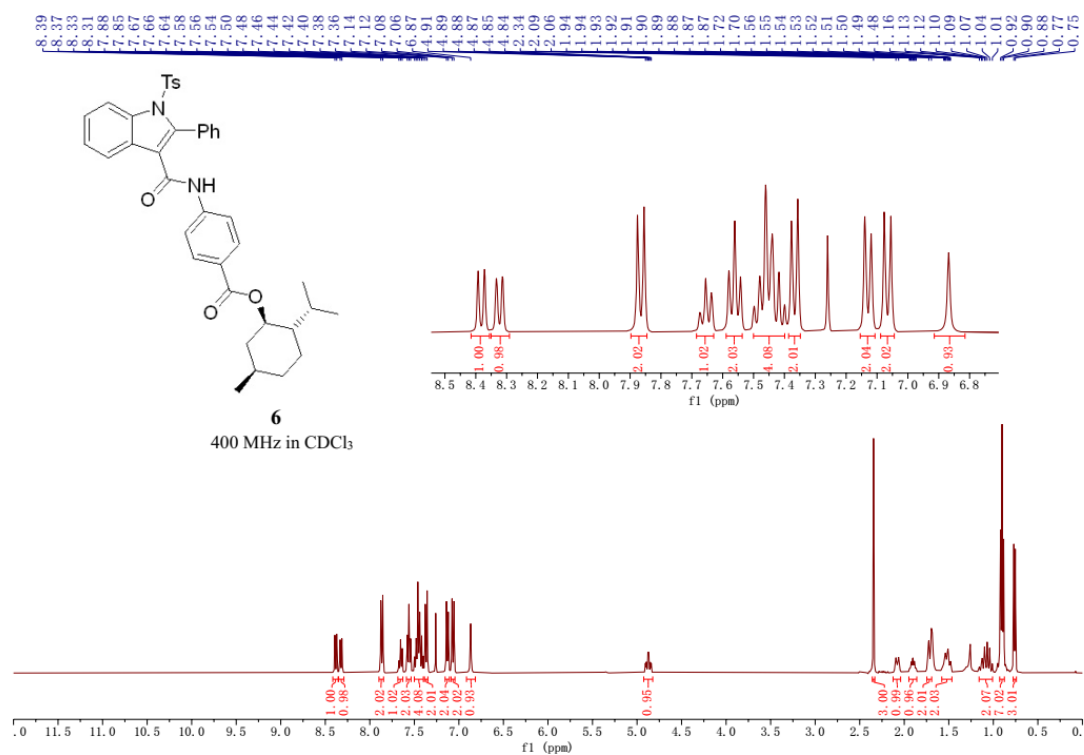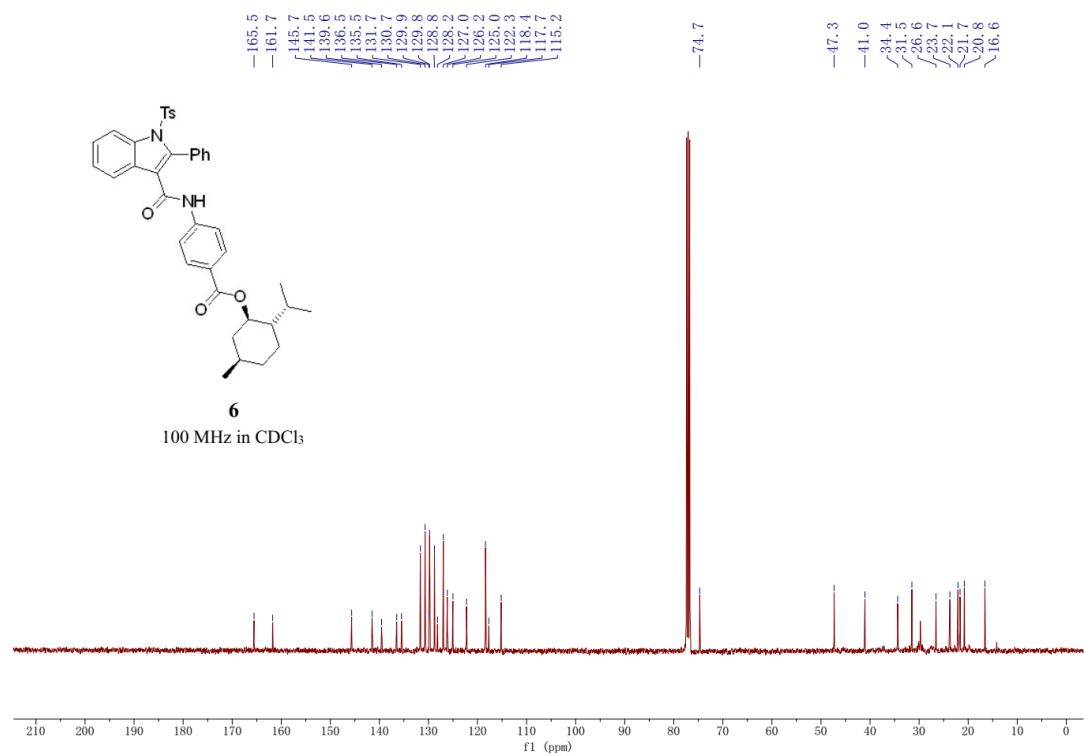

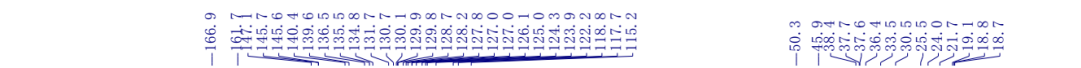



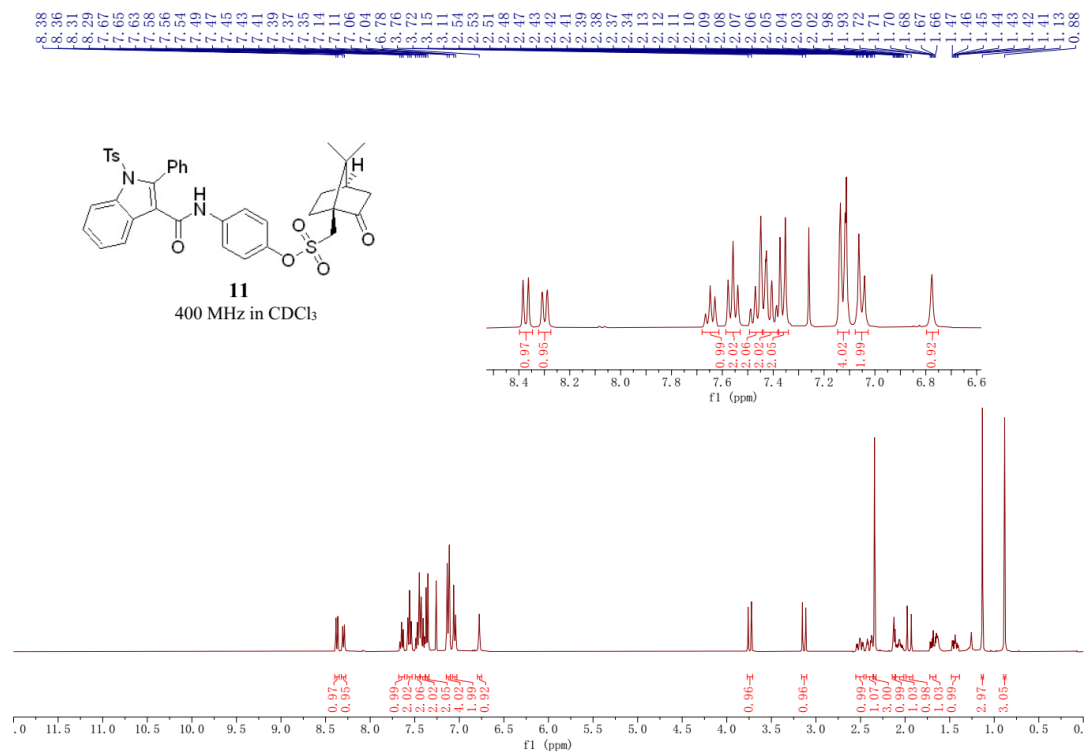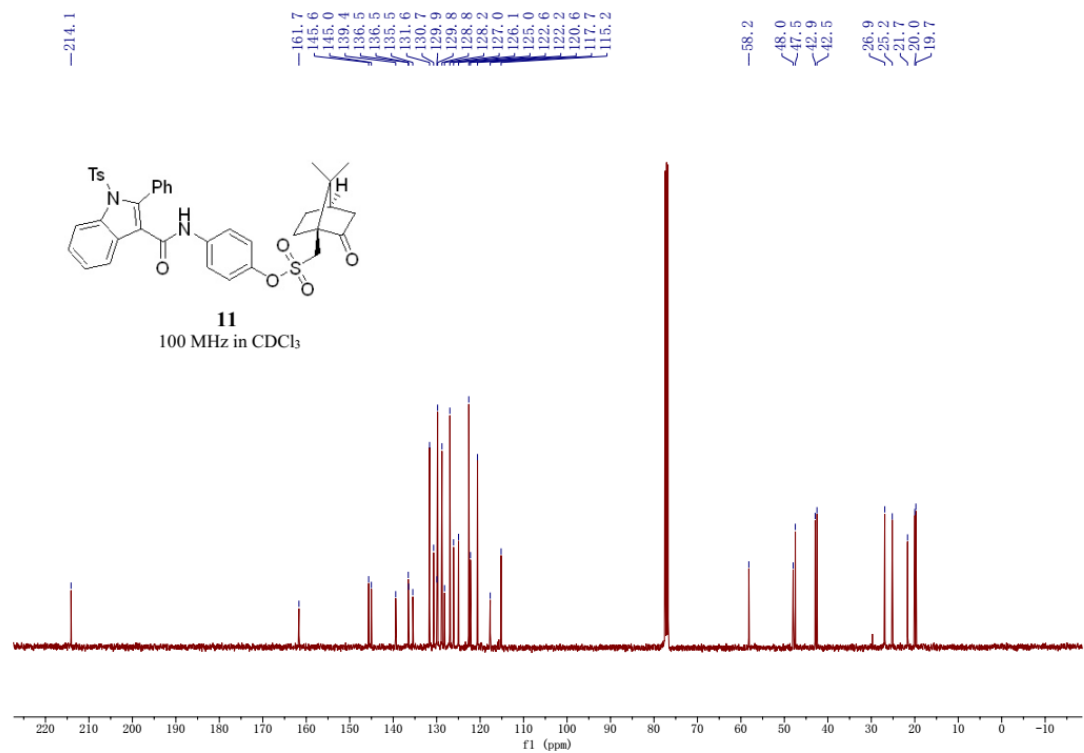

Supplement: d2qo01065h1.pdf [file d2qo01065h1.pdf]
